1 **Functional interpretation of *ATAD3A* variants in neuro-mitochondrial phenotypes**  
2 **(Running title: *Drosophila* aids interpretation of *ATAD3A* alleles)**

3 Zheng Yie Yap<sup>1\*</sup>, YoHan Park<sup>1\*</sup>, Saskia B. Wortmann<sup>2,3,4\*</sup>, Adam C. Gunning,<sup>5,6</sup> Sukyoung

4 Lee,<sup>7</sup> Lita Duraine,<sup>8</sup> Ekkehard Wilichowski,<sup>9</sup> Kate Wilson,<sup>10</sup> Johannes A. Mayr,<sup>3</sup> Matias

5 Wagner<sup>2,11</sup>, Hong Li,<sup>12,13</sup> Usha Kini,<sup>10</sup> Emily Davis Black,<sup>13</sup> James R. Lupski,<sup>14-17</sup> Sian Ellard,<sup>5,6</sup>

6 Dominik S. Westphal,<sup>2</sup> Tamar Harel,<sup>18#</sup> Wan Hee Yoon<sup>1#</sup>

7 1. Aging and Metabolism Research Program, Oklahoma Medical Research Foundation,  
8 Oklahoma City, OK, USA

9 2. Institute of Human Genetics, Technical University Munich, Munich, Germany

10 3. University Children's Hospital, Paracelsus Medical University (PMU), Salzburg, Austria

11 4. Radboud Centre for Mitochondrial Medicine (RCMM), Amalia Children's Hospital,  
12 Nijmegen, The Netherlands

13 5. Exeter Genomics Laboratory, Royal Devon and Exeter NHS Foundation Trust, Exeter EX2  
14 5DW, UK

15 6. Institute of Biomedical and Clinical Science, College of Medicine and Health, University of  
16 Exeter, Exeter EX2 5DW, UK

17 7. Verna and Marrs McLean Department of Biochemistry and Molecular Biology, Baylor  
18 College of Medicine, Houston, TX, USA.

19 8. Jan and Dan Duncan Neurological Research Institute, Baylor College of Medicine, Houston,  
20 TX, USA

21 9. Department of Pediatrics and Pediatric Neurology, University Medical Center Göttingen,  
22 Georg-August-Universität Göttingen, Göttingen, Germany

- 1 10. Oxford Centre for Genomic Medicine, Oxford University Hospitals NHS Foundation Trust,
- 2 Oxford, UK
- 3 11. Institute of Neurogenomics, Helmholtz Zentrum München, Neuherberg, Germany
- 4 12. Department of Human Genetics, School of Medicine, Emory University, Atlanta, GA, United
- 5 States
- 6 13. Department of Pediatrics, School of Medicine, Emory University, and Children's Healthcare
- 7 of Atlanta, Atlanta, GA, United States
- 8 14. Department of Molecular and Human Genetics, Baylor College of Medicine, Houston, TX
- 9 77030, USA
- 10 15. Department of Pediatrics, Baylor College of Medicine, Houston, TX 77030, USA
- 11 16. Human Genome Sequencing Center, Baylor College of Medicine, Houston, TX 77030, USA
- 12 17. Texas Children's Hospital, Houston, TX 77030, USA
- 13 18. Department of Genetics, Hadassah-Hebrew University Medical Center, Jerusalem, Israel
- 14 9112001

15 \* These authors contributed equally to the manuscript.

16 **# Corresponding authors:**

17 Wan Hee Yoon, Ph.D.  
18 Aging & Metabolism Research Program  
19 Oklahoma Medical Research Foundation  
20 Oklahoma City, OK, 73104, USA  
21 +(1)-405-271-1574 (office)  
22 Email: [wanhee-yoon@omrf.org](mailto:wanhee-yoon@omrf.org)  
23  
24 Tamar Harel, M.D., Ph.D.  
25 Department of Genetics  
26 Hadassah-Hebrew University Medical Center POB 12000  
27 Jerusalem, Israel 9112001  
28 +(972)-2-6776329 (office)  
29 +(972)-2-6777618 (fax)  
30 Email: [tamarhe@hadassah.org.il](mailto:tamarhe@hadassah.org.il)

## 1 **ABSTRACT**

2 Background: The ATPase family AAA-domain containing protein 3A (*ATAD3A*) is a nuclear-  
3 encoded mitochondrial membrane anchored protein involved in diverse processes including  
4 mitochondrial dynamics, mitochondrial DNA organization, and cholesterol metabolism. Biallelic  
5 deletions (null), recessive missense variants (hypomorph), and heterozygous missense variants or  
6 duplications (antimorph) in *ATAD3A* lead to neurological syndromes in humans.

7 Objective: To expand the mutational spectrum of *ATAD3A* variants and to provide functional  
8 interpretation of missense alleles in trans to deletion alleles.

9 Methods: Exome sequencing was used to identify single nucleotide variants (SNVs) and copy  
10 number variants (CNVs) in *ATAD3A* in individuals with neurological and mitochondrial  
11 phenotypes. A *Drosophila* *Atad3A* Gal4 trap null allele was generated using CRISPR-Cas9  
12 genome editing technology to aid interpretation of variants.

13 Results: We report 13 individuals from 8 unrelated families with biallelic *ATAD3A* variants. Four  
14 of the identified missense variants, p.(Leu77Val), p.(Phe50Leu), p.(Arg170Trp), p.(Gly236Val),  
15 were inherited in trans to loss-of-function alleles. A fifth missense variant, p.(Arg327Pro), was  
16 homozygous. Affected individuals exhibited findings previously associated with *ATAD3A*  
17 pathogenic variation, including developmental delay, hypotonia, congenital cataracts,  
18 hypertrophic cardiomyopathy, and cerebellar atrophy. *Drosophila* studies indicated that  
19 Phe50Leu, Gly236Val, and Arg327Pro are severe loss-of-function alleles leading to early  
20 developmental lethality and neurogenesis defects, whereas Leu77Val and Arg170Trp are partial  
21 loss of function alleles that cause progressive locomotion defects. Moreover, Leu77Val and  
22 Arg170Trp expression leads to an increase in autophagy and mitophagy in adult muscles.

1 Conclusion: Our findings expand the allelic spectrum of ATAD3A variants, and exemplify the  
2 use of a functional assay in *Drosophila* to aid variant interpretation.

3 **Keywords:** ATAD3A, mitochondria, disease, autosomal recessive, autophagy, neurogenesis,  
4 *Drosophila*, AAA+ protein

5

6

## 1 BACKGROUND

2 The ATPase family AAA-domain containing protein 3A (ATAD3A) belongs to a family  
3 of hexameric ATPases associated with diverse cellular activities (AAA+ ATPase proteins). It  
4 was initially identified as a mitochondrial protein enriched at contact sites between the  
5 mitochondria and the endoplasmic reticulum (ER) membrane.<sup>1</sup> The protein is presumed to tether  
6 the inner mitochondrial membrane to the outer mitochondrial membrane and has the capacity to  
7 interact with the ER, thus potentially regulating mitochondria-ER interorganellar interactions and  
8 exchanges.<sup>1;2</sup> Several studies have alluded to the importance of ATAD3A in embryonic  
9 development. Deletion of *Atad3a* in mice causes embryonic lethality at day E7.5, with growth  
10 retardation and defective development of the trophoblast lineage.<sup>3</sup> Knockdown of the *Drosophila*  
11 ortholog, *belphegor*, (*bor*, *dAtad3a*) results in growth arrest during larval development,<sup>1</sup> and the  
12 *C. elegans* ortholog is essential for mitochondrial activity and development.<sup>4</sup> RNAi studies of  
13 human *ATAD3A* in lung cancer cells have documented increased mitochondrial fragmentation  
14 and a decreased co-localization of mitochondria and endoplasmic reticulum (ER).<sup>5</sup>

15 In humans, the ATAD3 gene family contains three paralogs that appear to have recently  
16 evolved by duplication of a single ancestral gene: *ATAD3A*, *ATAD3B*, and *ATAD3C*. These are  
17 located in tandem and map to chromosome 1p36.33.<sup>3;6</sup> The major *ATAD3A* isoform, p66, is  
18 ubiquitously expressed, whereas the major *ATAD3B* isoform, p67, is specifically expressed  
19 during development<sup>6</sup> and reactivated in cancer.<sup>7;8</sup> *ATAD3C* lacks four exons, suggesting that it  
20 may be a pseudogene. The genetic architecture dictated by three highly homologous paralogs  
21 predisposes the region to genomic instability and rearrangements generated by nonallelic  
22 homologous recombination (NAHR).<sup>9;10</sup>

1 To date, the allelic spectrum of *ATAD3A*-associated disease [MIM: 617183] includes  
2 null, hypomorph, and antimorph alleles.<sup>10-14</sup> Biallelic deletions mediated by NAHR, most often  
3 spanning ~38kb between *ATAD3B* and *ATAD3A* and less frequently ~67kb between *ATAD3C*  
4 and *ATAD3A*, lead to an infantile-lethal presentation including respiratory insufficiency, neonatal  
5 seizures, congenital contractures, corneal clouding and/or edema, pontocerebellar hypoplasia and  
6 simplified sulcation and gyration.<sup>12</sup> Deletions between *ATAD3B* and *ATAD3A* lead to a fusion  
7 transcript under regulation of the weaker *ATAD3B* promoter, and thus show decreased  
8 expression of an ATAD3B/ATAD3A fusion protein that presumably is sufficient for fetal  
9 development but apparently cannot sustain life beyond the neonatal period.<sup>12</sup> The reciprocal,  
10 NAHR-mediated duplication at this locus, between *ATAD3C* and *ATAD3A*, results in a fusion  
11 gene encoding a dysfunctional protein.<sup>15</sup> Homozygosity for presumed hypomorphic missense  
12 alleles (p.Thr53Ile, p.Thr84Met) leads to bilateral cataracts, hypotonia, ataxia and cerebellar  
13 atrophy.<sup>10; 16</sup> Finally, a recurrent *de novo* heterozygous missense variant (p.Arg528Trp) acts as an  
14 antimorph or dominant-negative allele and gives rise to a phenotypic spectrum including  
15 developmental delay, hypotonia, optic atrophy, axonal neuropathy, and hypertrophic  
16 cardiomyopathy.<sup>10</sup>

17 We report on the clinical and molecular findings of 13 individuals from 8 families with  
18 biallelic variants at the *ATAD3A* locus, and expand the allelic spectrum to include those with a  
19 missense variant inherited in *trans* to an expected loss-of-function (deletion or frameshift) allele.  
20 *In vivo* functional studies for the missense variants in *ATAD3A* using a *Drosophila* model  
21 revealed that these were hypomorphic alleles that exhibited diverse allelic strength, and shed  
22 light on genotype-phenotype correlations.

23

## 1    **METHODS**

### 2    **Exome analysis**

3    Following informed consent, exome sequencing was pursued on DNA extracted from whole  
4    blood of affected individuals from each of 8 unrelated families. Study design was adapted to  
5    each family, and was either proband-only, trio (parents and affected child), or sibship analysis.  
6    For Families 2, 4, 5, and 6, sample collection, DNA extraction, exome library preparation,  
7    sequencing, and variant calling and annotation were performed as previously described.<sup>17</sup> For  
8    Family 6, trio whole exome sequencing was performed using the proband's and unaffected  
9    parents' samples. Exome read-depth was assessed manually. For Families 1, 7, and 8, exome  
10    sequencing and data analysis were as previously described in Wagner et al. (2019).<sup>18</sup>

### 11    **Sanger validation and segregation of the variants**

12    Single nucleotide variants (SNV) of interest were confirmed by Sanger sequencing, and  
13    segregation of variants was carried out in available family members. Intergenic *ATAD3B*-  
14    *ATAD3A* copy number variants were not confirmed, as these have been well established in recent  
15    literature and exome read-depth data was compelling.

### 16    **3D Modeling of Protein Structure**

17    The 3D model was predicted with I-TASSER.<sup>19</sup> After inspection of the predicted model, two  
18    helices (residues 225-242 and 247-264) were inserted manually. Spatial arrangement of  
19    secondary structures was adjusted manually to ensure proper domain separation by the  
20    mitochondria inner membrane.

## 1 Cloning and Transgenesis

2 *dAtad3a-T2A-Gal4* allele was generated using modified methods of CRISPR/Cas-9-mediated  
3 genome editing<sup>20</sup> and homology-dependent repair<sup>21</sup> by WellGenetics Inc. We targeted the first  
4 coding intron of *dAtad3a* using gRNAs (TGTGATAGCGTGGCGCATGC[CGG]). The gRNA  
5 was cloned into an U6 promoter plasmid. Cassette T-GEM(1) is composed of an attP site, a  
6 linker for phase 1 in-frame expression, T2A, Gal4, Hsp70 transcription terminator, a floxed  
7 3xP3-RFP, and an inverted attP (*attB-splicing acceptor-T2A-Gal4-polyA-loxP-3xP3-RFP-loxP-*  
8 *attB*).<sup>22</sup> The cassette and two homology arms were cloned into pUC57-Kan as a donor template  
9 for repair. The cassette contains an upstream homology arm (HA<sub>L</sub> - 1016bp) and a downstream  
10 homology arm (HA<sub>L</sub> - 1039bp). The homology arms were amplified using primers: HA<sub>L</sub>-F: 5'-  
11 GCACGCCCAATTAGCATT-3', HA<sub>L</sub>-R 5'- GGTTATGCAATTGGCTGATGAAA-3',  
12 HA<sub>R</sub>-F: 5'- GGAGGCCCTCGAGCTGTC -3', HA<sub>R</sub>-R: 5'- CCAGTCGAACACCTTGTGGA -  
13 3'. The gRNA and hs-Cas9 were supplied in DNA plasmids, together with donor plasmid for  
14 microinjection into embryos of control strain *w<sup>1118</sup>*. F1 progenies carrying selection marker of  
15 3xP3-RFP were further validated by genomic PCR and Sanger sequencing. 3xP3-RFP was  
16 removed by Cre recombinase.

17 For construction of pUASTattB-dAtad3a<sup>WT</sup>-V5, a full-length dAtad3a cDNA was amplified by  
18 PCR from a pUAST-dAtad3a clone<sup>10</sup>, and then subcloned into a pUASTattB vector<sup>23</sup> using  
19 primers: 5'-GGATCCaaaATGTCGTGGCTTTTGGGCAGG -3', 5'-  
20 GCGGCCGCTTAGGTGCTATCCAGTCCGAGCAGTGGATTCGGGATCGGCTTGCCGCC  
21 GCTTCC CAGTTTCTTTGCAGTTAGGGTG-3'.



1 pUASTattB-dAtad3a<sup>L83V</sup>-V5, pUASTattB-dAtad3a<sup>F56L</sup>-V5, pUASTattB-dAtad3a<sup>R176W</sup>-V5,  
2 pUASTattB-dAtad3a<sup>G242V</sup>-V5, and pUASTattB-dAtad3a<sup>R333P</sup>-V5 were generated by site-directed  
3 mutagenesis PCR using primers: (L83V)-F: 5'-  
4 cacgcccgggaggcctcgagGTGtccaagatgcaggaggccacc -3', (L83V)-R: 5'-  
5 ggtggcctcctgcatcttggacACcctcggggcctcccgggctg-3', (F56L)-F: 5'-  
6 aaggccatggaagcgtaccgcTTAgatTCGTCGGCGCTGGAACGT-3', (F56L)-R: 5'-  
7 ACGTTCCAGCGCCGACGAatcTAAgcggtacgttccatggcctt-3', (R176W)-F: 5'-  
8 gtccagcgtcaaggccatgTGGcgcagaccatcgagcagag -3', (R176W)-R: 5'-  
9 ctctgctcgatggtctggcgCCAcatggcctcttgacgtggac -3', (G242V)-F: 5'-  
10 gctggtactgttatcgggtccGtTgctgaggctatgcttaccgac-3', (G242V)-R: 5'-  
11 gtcgtaagcatagcctcagcAaCggcaccgataacagtaccagc-3', (R333P)-F: 5'-  
12 ctaaatccgaagctggaggaaCcGcttcgtgacattgccatgcc-3', (R333P)-R: 5'-  
13 ggcgatggcaatgtcacgaagCgGttcctccagcttcggattag-3'. A series of pUASTattB-dAtad3a constructs  
14 were injected into *y,w,  $\Phi$ C31; VK37* embryos, and transgenic flies were selected.

## 15 **Fly Strains and Maintenance**

16 The following stocks were obtained from the Bloomington Stock Center at Indiana University  
17 (BDSC): *w<sup>1118</sup>; PBac{PB}bor<sup>c05496</sup>/TM6B, Tb<sup>1</sup>, w<sup>1118</sup>; Df(3R)Excel7329/TM6B, Tb<sup>1</sup>, and w\**;  
18 *20xUAS-IVS-mCD8::GFP* (on III). All flies were maintained at room temperature (21°C). All  
19 crosses were kept at 25°C.

## 20 **Western Blotting**

21 Fly heads were homogenized in 1x Laemmli sample buffer containing 2.5%  $\beta$ -mercaptoethanol  
22 (Sigma-Aldrich). After boiling for 10 min, samples were loaded into 4–20% Mini-PROTEAN®

1 TGX Stain-Free™ Protein Gels (Bio-Rad), separated by SDS-PAGE, and transferred to  
2 nitrocellulose membranes (Bio-Rad). The primary antibodies were used for overnight shaking at  
3 4°C by the following dilution: mouse anti-V5 (Invitrogen Cat# R960-25 RRID: AB\_2556564),  
4 1:2,000; mouse anti-ATP5A (Abcam Cat# ab14748 RRID: AB\_301447), 1:2000; mouse anti-  
5 Actin (MP Biomedicals Cat# 8691002), 1:20,000; rabbit anti-Ref2(P) (kindly provided by Sheng  
6 Zhang). HRP conjugated goat anti-rabbit (Invitrogen Cat# G-21234 RRID: AB\_2536530), anti-  
7 mouse (Invitrogen Cat# A-28177 RRID: AB\_2536163) were used at 1:7,000, and visualized with  
8 ECL(Bio-Rad).

### 9 **Embryo Collection and Immunostaining**

10 Embryos were collected on grape juice plates for 24 hours at 37°C. Collected embryos were  
11 washed twice with deionized water, and dechorionated with 50 % bleach for 3 minutes. After  
12 rinsed thoroughly, embryos were fixed for 30 minutes by 1:1 ratio of Heptane (Sigma Aldrich  
13 Cat #246654-1L) and 4 % formaldehyde (Thermo Fisher Cat#F79500) in 1 x Phosphate Buffered  
14 Saline (PBS), pH 7.4. To remove vitelline membranes, embryos were shaken vigorously in  
15 methanol for 5 times. 1 x PBS, pH 7.4 containing 0.2% BSA and 0.3 % Triton-X100 were used  
16 for rehydration and washing. The primary antibodies were used for overnight at the following  
17 dilutions: rat anti-Elav 1:500 (DSHB Cat# 7E8A10 RRID:AB\_528218), rabbit anti-β-  
18 galactosidase 1:250 (Invitrogen Cat# A-11132 RRID: AB\_221539), rabbit anti-GFP 1:1000  
19 (Invitrogen Cat# A-11122 RRID:AB\_221569), Alexa 647 conjugated goat anti-Horseradish  
20 Peroxidase 1:500 (Jackson ImmunoResearch Labs Cat# 123-605-021 RRID: AB\_2338967).  
21 Alexa 488 conjugated anti-rat (Invitrogen Cat# A-21208 RRID: AB\_2535794), and Alexa 568  
22 conjugated anti-rabbit (Invitrogen Cat# A-11011 RRID: AB\_143157) secondary antibodies were  
23 used at 1:500. Samples were mounted in Vectashield (Vector Labs Cat# 10198-042, Burlingame,

1 CA). Imaging was performed using LSM710 confocal microscope (Zeiss). Images were  
2 processed with Zeiss LSM Image Browser and Adobe Photoshop.

### 3 **Adult Drosophila Thorax Sectioning**

4 Flies were fixed in 4% formaldehyde with PBS containing 0.3% TritonX-100 for 4 hours at 4°C  
5 on rotator and rinsed with PBS to remove any residual formaldehyde. Fixed flies were then  
6 dissected in PBS. Firstly, fly wings were removed carefully without tearing the tissue of the  
7 thorax. Then the head and abdomen together with the intestines are removed so only the thorax  
8 would remain. Holding onto the legs as support to stabilize the thorax, a sharp blade was used  
9 to make a slice down the middle of the thorax (dorsal side). The thorax was transferred into an  
10 Eppendorf tube and washed with PBS to remove any debris. The primary antibodies were used at  
11 the following dilutions: mouse anti-ATP5A 1:500, rabbit anti-Ref2p 1:1000. Alexa 488  
12 conjugated and Alexa 568 conjugated secondary antibodies were used at 1:500. Samples were  
13 mounted in Vectashield. Imaging was performed using LSM710 confocal microscope (Zeiss).  
14 Images were processed with Zeiss LSM Image Browser and Adobe Photoshop.

### 15 **Drosophila Flight Assay**

16 The method was adapted from Pesah et al. (2004).<sup>24</sup> Flies were anesthetized and allocated into  
17 individual food vials for 24 hours at 25°C before the assays were performed to allow full  
18 recovery from the effects of CO<sub>2</sub>. Each individual vial was inverted into a 500mL measuring  
19 cylinder and gently tapped to dislodge the fly into the cylinder. Flies either fell to the bottom in a  
20 straight line or flew to the side of the cylinder. Recording of the whole process was taken and  
21 analysis is done based on each behavior the flies exhibited. 25 flies of each genotype were  
22 assayed.

## 1 **Drosophila Climbing Assay**

2 Method was adapted from Madabattula et al. (2015).<sup>25</sup> 25 flies were anesthetized using CO<sub>2</sub> and  
3 allowed to rest in fresh food vials 24 hours at 25°C prior to the assay. Male and female flies were  
4 kept separately as gender difference on behavior might be significant. To prepare the climbing  
5 apparatus, measure a distance of 8 cm from the bottom surface of an empty polystyrene vial and  
6 mark the distance by drawing a line around the entire circumference of the vial. Flies were  
7 transferred without using CO<sub>2</sub> into different climbing apparatus for each genotype to prevent  
8 cross contamination. The apparatus was closed off by vertically joining to another empty  
9 polystyrene vial using tape and the flies were left to acclimatize to the surrounding for at least 10  
10 min. Then, the apparatus was gently tapped five times to displace the flies to the bottom of the  
11 apparatus and a video was recorded for 20 s to measure the number of flies able to cross the  
12 height of 8 cm at each time point. After a 10 min rest, the assay was repeated. Three trials were  
13 conducted.

14

## 15 **Transmission Electron Microscopy**

16 *Drosophila* thoraxes were imaged following standard Electron Microscopy procedures using a  
17 Ted Pella Bio Wave processing microwave with vacuum attachments. Briefly, whole thorax  
18 with wings were dissected at room temperature in modified Karnovskii's fixative in 0.1 M  
19 Sodium Cacodylate buffer at pH 7.2 and subsequently fixed overnight to three days in the same  
20 fixative. The pre-fixed thoraxes were then irradiated and fixed again, followed by 3x millipore  
21 water rinses, post-fixed with 1% aqueous Osmium Tetroxide, and 1% Potassium Ferrocyanide  
22 mixture in Millipore water. This was followed by 3X Millipore water rinses. Ethanol  
23 concentrations from 30-100% were used for the initial dehydration series, followed with 100%

1 Propylene Oxide as the final dehydrant. Samples were gradually infiltrated with 3 ratios of  
2 propylene oxide and Embed 812, finally going into 3 changes of pure resin under vacuum.  
3 Samples were allowed to infiltrate in pure resin overnight on a rotator. The samples were  
4 embedded into flat silicone molds and cured in the oven at 62°C for at least three days. The  
5 polymerized samples were thin-sectioned at 48-50 nm and stained with 1% uranyl acetate for  
6 thirteen minutes followed by 2.5% lead citrate for two and a half minutes the day before TEM  
7 examination. Grids were viewed in a JEOL 1400 Plus transmission electron microscope at  
8 80kV. Images were captured using an AMT XR-16 mid-mount 16 mega-pixel digital camera in  
9 Sigma mode. Images were contrast adjusted in Image J.

10

11

12

13

14

15

16

17

18

## 1 RESULTS

### 2 Clinical Reports

3 Biallelic variants in *ATAD3A* were identified in 13 individuals from 8 previously  
4 unreported families (**Figure 1A**). These included different combinations of copy number variants  
5 (CNV) and/or single nucleotide variants (SNV). Detailed clinical presentations are supplied in  
6 **Table 1 and Table S1 (Clinical information -Additional file 1)**. Briefly, individuals with  
7 biallelic deletion CNVs showed a neonatal-lethal presentation with respiratory failure,  
8 generalized hypotonia, seizures, congenital contractures, bilateral ophthalmologic findings, and  
9 brain anomalies, consistent with the reported phenotype.<sup>12</sup> Individuals with a loss-of-function  
10 allele (intergenic CNV, intragenic CNV, or frameshift SNV) inherited in *trans* to a missense  
11 variant (Families 3-6) presented with varied severity of the phenotype (**Table 1, and Table S1 -**  
12 **Clinical information -Additional file 1**), which we hypothesized to correlate with the degree of  
13 pathogenicity of the missense alleles. Finally, two families with other combinations of biallelic  
14 variants (nonframeshift indels or missense variants, Families 7-8) presented with *ATAD3A*-  
15 associated features such as cataracts and hypertrophic cardiomyopathy. Affected individuals in  
16 Family 8 exhibited severe phenotypes and lethality at 6-7 months after birth. Variants identified  
17 by exome data analysis were tested for segregation with the disease by Sanger sequencing. Of  
18 note, in Family 7, the c.150C>G; p.(Phe50Leu) was *de novo* in the proband, and presumably  
19 arose on the paternal allele, since the c.1703\_1705delAGA variant was inherited from the  
20 mother.

21

1 **Table 1.** Summary of significant clinical findings

|                                              | Family 1                                  | Family 2                               | Family 3                                               | Family 4 (2 siblings)                                                       | Family 5 (3 siblings)                                          | Family 6                                                | Family 7                                                           | Family 8 (3 siblings)               |
|----------------------------------------------|-------------------------------------------|----------------------------------------|--------------------------------------------------------|-----------------------------------------------------------------------------|----------------------------------------------------------------|---------------------------------------------------------|--------------------------------------------------------------------|-------------------------------------|
| <b>ATAD3A variants (NM_001170535.1)</b>      | <i>ATAD3B-ATAD3A</i> ~38KB deletion (hom) | <i>ATAD3B-ATAD3A</i> comp het deletion | <i>ATAD3B-ATAD3A</i> del;<br>c.229C>G;<br>p.(Leu77Val) | Exon 3-4 del (c.(282+1_283-1)_(444+1_445-1)del<br>c.150C>G;<br>p.(Phe50Leu) | c.1141dup;<br>p.(Val381Glyfs*17)<br>c.508C>T,<br>p.(Arg170Trp) | c.1414del<br>p.(His472fs)<br>c.707G>T,<br>p.(Gly236Val) | c.150C>G,<br>p.(Phe50Leu);<br>c.1703_1705delAG<br>A, p.(Lys568del) | c.980G>C,<br>p.(Arg327Pro)<br>(hom) |
| <b>Age at last exam</b>                      | 13 d (deceased)                           | 30 hours (deceased)                    | 19 mo (deceased at 2 y)                                | Died shortly after birth                                                    | 17-19 years                                                    | 3 mo                                                    | 15 y                                                               | 6-7 mo (all deceased)               |
| <b>Developmental delay</b>                   | NR                                        | NR                                     | global DD                                              | NR                                                                          | moderate-severe learning difficulties                          | NA                                                      | mild DD                                                            | NR                                  |
| <b>Neurological exam</b>                     | hypotonia, no respiratory effort          | hypotonia, no respiratory effort       | NA                                                     | hypotonia, no respiratory effort                                            | ataxia, muscle wasting                                         | central hypotonia, increased peripheral tone            | mild hypotonia,                                                    | NA                                  |
| <b>Congenital cataract</b>                   | +                                         | cloudy corneas                         | +                                                      | NA                                                                          | one of 3 siblings                                              | -                                                       | +                                                                  | +                                   |
| <b>Hypertrophic cardiomyopathy</b>           | +                                         | +                                      | +                                                      | +                                                                           | -                                                              | +                                                       | +                                                                  | +                                   |
| <b>Cerebellar atrophy/hypoplasia</b>         | +                                         | +                                      | NA                                                     | +                                                                           | +                                                              | +                                                       | +                                                                  | NA                                  |
| <b>Elevated 3-methylglutaconate in urine</b> | NA                                        | NA                                     | NA                                                     | +                                                                           | NA                                                             | NA                                                      | NA                                                                 | +                                   |
| <b>Other</b>                                 | -                                         | undescended testes                     | -                                                      | -                                                                           | hearing loss                                                   | -                                                       | GH deficiency                                                      | -                                   |

2

3 Abbreviations: DD – developmental delay; dup – duplication; GH – growth hormone; hom – homozygous; NA – not available

4

5

6

1 **Table 2. Missense variants identified in *ATAD3A***

| Position [hg19] | Nucleotide* | Protein*      | gnomAD (MAF) | gnomAD hom | CADD score | SIFT | MT | DANN | Revel | GERP  |
|-----------------|-------------|---------------|--------------|------------|------------|------|----|------|-------|-------|
| Chr1:1451415    | c.229C>G    | p.(Leu77Val)  | 0.0004       | 0          | 22.1       | T    | D  | D    | B     | 2.53  |
| Chr1:1447798    | c.150C>G    | p.(Phe50Leu)  | 0            | 0          | 25.1       | T    | D  | D    | B     | 1.95  |
| Chr1:1454364    | c.508C>T    | p.(Arg170Trp) | 0.000004     | 0          | 25.5       | D    | D  | D    | B     | -0.33 |
| Chr1:1455954    | c.707G>T    | p.(Gly236Val) | 0            | 0          | 25.6       | D    | D  | D    | D     | 4.42  |
| Chr1:1459235    | c.980G>C    | p.(Arg327Pro) | 0            | 0          | 25.8       | D    | D  | D    | D     | 4.8   |

2 \* Variant nomenclature provided according to NM\_001170535.1.

3 Abbreviations: B – benign; D – damaging/deleterious; hom – homozygotes; MT –  
4 MutationTaster; T – tolerated

5

6 ***In silico* analysis of missense variants identified in affected individuals**

7 The five *ATAD3A* missense variants identified in affected individuals include (provided  
8 according to NM\_001170535.3, see **Table 2**): c.150C>G, p.(Phe50Leu), c.229C>G,  
9 p.(Leu77Val), c.508C>T, p.(Arg170Trp), c.707G>T, p.(Gly236Val), and c.980G>C,  
10 p.(Arg327Pro). These variants will be referred to as F50L, L77V, R170W, G236V, and R327P,  
11 respectively. The variants have not been reported previously as pathogenic variants and were not  
12 seen in the homozygous state in gnomAD, the largest available population database  
13 (<https://gnomad.broadinstitute.org/>) (<https://www.biorxiv.org/content/10.1101/531210v3>). All of  
14 the altered residues are evolutionarily conserved in species of the animal kingdom (Figure 1B).

15 In silico structural modeling of ATAD3A by PredictProtein<sup>26</sup> suggested that each amino  
16 acid variant would alter the predicted protein structure (Figure 1D). Phe50 is located next to the  
17 first  $\alpha$ -helix following the disordered region. Leu77, Arg170, Gly236 and Arg327 are strictly  
18 conserved and found in  $\alpha$ -helices. Leu77 is predicted to be buried inside the ATAD3A structure  
19 and is not exposed at the surface. The p.(Leu77Val) variant could affect a hydrophobic  
20 interaction between the  $\alpha$ -helix and other part of the structure due to shortening of the side chain



1 by one carbon. On the contrary, Arg170 is predicted to be surface exposed. Hence, the  
2 p.(Arg170Trp) variant may increase surface hydrophobicity, reducing solubility and resulting in  
3 a less stable protein. Gly236 is located next to the GxxFG motif that guides the folding and  
4 assembly of the membrane-spanning amphipathic  $\alpha$ -helix. The p.(Gly236Val) variant may affect  
5 the interaction between this potential transmembrane helix and the mitochondrial inner or outer  
6 membrane or between neighboring transmembrane helices of the ATAD3A hexamer due to the  
7 longer side chain. Arg327 is located next to the ATP binding pocket. The side chain of Arg327  
8 forms a salt bridge with the carboxylate of the Glu469 side chain, and also makes a hydrogen  
9 bond interaction with the main chain carbonyl of Met470 (Figure 1D). This interaction would be  
10 abolished by the p.(Arg327Pro) variant, resulting in structural changes that could impact ATP  
11 binding. Collectively, in silico analyses suggest that these variants could impair ATAD3A  
12 function.

### 13 14 ***Drosophila* studies of missense variants**

15 To investigate the functional consequences of missense variants in *ATAD3A*, we created a  
16 new *Drosophila Atad3a* (*dAtad3a*) allele based on recently developed CRISPR/Cas-9-mediated  
17 genome editing and *Drosophila* genetic technologies.<sup>20-22</sup> To create a null allele, we introduced  
18 an artificial exon cassette carrying *attP-SA (splicing acceptor)-T2A-Gal4-polyA-attP* into the  
19 first coding intron of *dAtad3a* (referred as *dAtad3a-T2A-Gal4*) (Figure 2A). These flies produce  
20 an N-terminal portion of the dATAD3A protein as well as the Gal4 protein whose expression is  
21 under control of endogenous cis-elements of *dAtad3a*. Gal4 is a transcriptional activator that  
22 drives expression of transgenes by binding UAS (Upstream Activating Sequence) (Figure 2A).  
23 To test expression patterns of *dAtad3a*, we generated flies having a *dAtad3a-T2A-Gal4* allele

1 with *UAS-mCD8::GFP*. We found that dATAD3A is expressed ubiquitously during  
2 embryogenesis, and that the expression pattern includes neurons in the brain and ventral nerve  
3 cord (VNC) (Figure S1). dATAD3A remains highly expressed in brain in both larval and adult  
4 stages. Moreover, dATAD3A is expressed in the adult thorax and in peripheral neurons in adult  
5 wings (Figure 2B).

6 To test whether the *dAtad3a-T2A-Gal4* allele is a loss of function mutation, we  
7 performed complementation studies. Flies carrying a *dAtad3a-T2A-Gal4* allele and a *dAtad3a*  
8 loss-of-function allele (*PBac {PB}dAtad3a<sup>c05496</sup>*) or fly mutants lacking the entire *dAtad3a*  
9 genomic region (*Df(3R)Excel7329*) exhibited lethality in embryo stages (Figure 2C). The  
10 lethality caused by *dAtad3a* loss was fully rescued by expression of wildtype *dAtad3a* cDNA  
11 (*UAS-dAtad3a<sup>WT</sup>*) (Figure 2C). Hence, the results indicate that *dAtad3a-T2A-Gal4* is a severe  
12 loss of function allele.

13 To determine whether the series of missense variants in *ATAD3A* identified from  
14 affected individuals impair *in vivo* protein levels of ATAD3A, we generated transgenic flies that  
15 allow expression of *dAtad3a* cDNA carrying homologous mutations for these missense variants  
16 (*UAS-dAtad3a<sup>L83V</sup>*, *UAS-dAtad3a<sup>F56L</sup>*, *UAS-dAtad3a<sup>R176W</sup>*, *UAS-dAtad3a<sup>G242V</sup>*, *UAS-dAtad3a<sup>R333P</sup>*)  
17 under the control of UAS. We expressed each transgene together with wild-type *dAtad3a* (*UAS-*  
18 *dAtad3a<sup>WT</sup>*) using the pan-neuronal Gal4 driver (*elav<sup>C155</sup>-Gal4*). All transgenes carry C-terminal  
19 V5 tag. Western blot analysis for adult heads revealed that no protein was detected from  
20 *dAtad3a<sup>G242V</sup>* expression, and the protein levels of dAtad3a<sup>R333P</sup> were lower than those in wild  
21 type control (*dAtad3a<sup>WT</sup>*) (Figure 2D). On the contrary, the protein levels from the other three  
22 transgenes (*UAS-dAtad3a<sup>L83V</sup>*, *UAS-dAtad3a<sup>F56L</sup>*, and *UAS-dAtad3a<sup>R176W</sup>*) were not significantly  
23 different than protein levels in the wild-type control (*dAtad3a<sup>WT</sup>*) (Figure 2D). Hence, these

1 results indicate that the G242V variant is a protein null allele, and that R333P moderately affects  
2 protein levels.

3 To determine the effects of the series of missense variants in *ATAD3A* identified from  
4 affected individuals on *in vivo* function of ATAD3A, we tested whether expression of each  
5 missense variant rescues the developmental lethality caused by *dAtad3a* loss. We found that  
6 expression of *dAtad3a*<sup>F56L</sup>, *dAtad3a*<sup>G242V</sup>, or *dAtad3a*<sup>R333P</sup> completely failed to rescue the lethality  
7 caused by loss of *dAtad3a*, indicating that these three variants are severe loss of function alleles  
8 (Figure 2E). Failure of lethality rescue by G242V is consistent with the Western results showing  
9 complete loss of the protein with this mutation (Figure 2D). The failure of lethality rescue by  
10 F56L and R333P could result from functional defects rather than the moderately decreased  
11 protein levels (~20-30%) because one copy loss of *dAtad3a* (*dAtad3a*<sup>T2A-Gal4/+</sup> or *PBac*  
12 *{PB}**dAtad3a*<sup>c05496/+</sup>) does not affect viability. On the contrary, expression of *dAtad3a*<sup>L83V</sup> or  
13 *dAtad3a*<sup>R176W</sup> fully rescued the developmental lethality caused by *dAtad3a* loss as we obtained  
14 adult *dAtad3a* null flies expressing *dAtad3a*<sup>L83V</sup>, or *dAtad3a*<sup>R176W</sup> in expected Mendelian ratios  
15 (Figure 2E). In addition, *dAtad3a* mutant larvae expressing *dAtad3a*<sup>L83V</sup>, or *dAtad3a*<sup>R176W</sup>  
16 exhibited comparable mitochondrial content to those of flies expressing *dAtad3a*<sup>WT</sup> (Figure S2).  
17 These results indicate that the flies carrying L83V and R176W variants did not exhibit  
18 developmental defects. Hence, the results indicate that F56L, G242V, and R333P are severe loss-  
19 of-function alleles, whereas L83V and R176W only mildly affect gene function.

20 To investigate the phenotypic strength of F56L, G242V, and R333P, we decided to  
21 characterize phenotypes during embryogenesis from *dAtad3a* null mutants as well as each  
22 mutant because most animals expressing these variants die before the 1<sup>st</sup> instar larvae stage. No  
23 reports for phenotypes caused by *dAtad3a* loss during embryogenesis have been documented so

1 far. Biallelic deletion of *ATAD3A* and adjacent *ATAD3* paralogs in humans causes severe neuro-  
2 developmental defects including fetal congenital pontocerebellar hypoplasia and neonatal death.  
3 <sup>10; 12</sup> Thus, we sought to determine whether *dAtad3a* loss causes defects in neurodevelopment in  
4 *Drosophila* embryos using anti-Elav (a neuronal marker), and anti-HRP (a marker for neuronal  
5 membranes) antibodies. We examined stage 15 embryos in which the central nervous system  
6 (CNS) including brains and ventral nerve cord (VNC), and the peripheral neurons and their  
7 neuronal projections are well established (Figure 3A). The *dAtad3a* null mutants exhibit a wide  
8 range of neurogenesis defects. We found that loss of *dAtad3a* results in 55% of embryos with  
9 defects in CNS development and 67% with defects in PNS development (*dAtad3a* lof, Figure  
10 3A). The CNS defects include brain mis-location, twisted and shrunken VNC, and partial  
11 absence of the VNC. The PNS phenotypes include partial absence of PNS cells, misguided PNS  
12 neural tracks, and failure of correct specification of the PNS cells. The phenotypes caused by  
13 *dAtad3a* loss were significantly rescued by expressing wildtype *dAtad3a* (*UAS-dAtad3a<sup>WT</sup>*) (29%  
14 CNS defects; 31% PNS defects), but not by expressing *dAtad3a<sup>F56L</sup>*, *dAtad3a<sup>G242V</sup>*, or  
15 *dAtad3a<sup>R333P</sup>* (Figure 3B). Expression of F56L (48% CNS; 55% PNS), and G242V (62% CNS;  
16 66% PNS) exhibited a phenotype strength comparable to those in null mutants, whereas R333P  
17 (60% CNS; 63% PNS) showed slightly weaker phenotypes (Figure 3B). Hence, we discovered  
18 that *dAtad3a* loss leads to severe neurodevelopmental defects in *Drosophila* embryos, and all  
19 three variants (F56L, G242V, and R333P) are severe loss of function alleles.

20 To investigate the phenotypes of L83V and R176W, we sought to characterize post-  
21 developmental phenotypes such as behavioral and age-associated phenotypes because expression  
22 of these variants did not exhibit developmental defects (Figure 2E, Figure S2). First, we  
23 performed life-span assays and found that *dAtad3a* null flies expressing L83V, or R176W

1 exhibited shorter lifespans compared to those in flies expressing wildtype *dAtad3a* (50% survival  
2 at day 57 (R176W), day 62 (L83V), and day 64 (WT)) (Figure 4A). dATAD3A is mainly  
3 expressed in adult thorax and head (Figure 2B), thus loss of its function may affect locomotion  
4 behavior. To test this, we performed a climbing assay. We found that both variants exhibited  
5 age-dependent locomotion defects and R176W showed more severe locomotion defects  
6 compared to L83V flies (Figure 4B). We also performed a flight assay that is more sensitive than  
7 the climbing assay. Flies expressing R176W exhibited a flight defect at a young age (day 5) and  
8 failed to fly at all in old age (day35), whereas flies expressing L83V showed normal flight in  
9 young age, but mildly defective flight in old ages (Figure 4C). Collectively, these results indicate  
10 that both L83V and R176W variants are partial loss of function alleles and that R176W has more  
11 defective gene function compared to L83V.

12 We previously showed that human fibroblasts carrying the *de novo* variant p.Arg528Trp  
13 exhibited an increase in mitophagic vesicles and expression of *dAtad3a* carrying p.Arg534Trp,  
14 the homologous mutation of human p.Arg528Trp, leads to small mitochondria with aberrant  
15 cristae as well as an increase in autophagic vesicles in larvae muscles.<sup>10</sup> These findings suggest  
16 that aberrant autophagy or mitophagy may underlie the behavioral defects in *dAtad3a* mutant  
17 flies expressing L83V or R176W (Figure 4). To test this, we sought to examine mitochondria  
18 morphology and autophagy in adult thorax muscles. First, we assessed mitochondrial  
19 morphology using an antibody for ATP5A in both young (5-day-old) and old (21- day-old) adult  
20 flies. We found that at both ages, R176W leads to smaller mitochondria with a rounded shape  
21 compared to those in wild type controls (Figure S3). On the contrary, the animals expressing  
22 L83V exhibited irregular size of mitochondria with slightly longer mitochondria on average

1 (Figure S3). These results indicate that both R176W and L83V variants affect mitochondrial  
2 dynamics, which in turn may lead to increased autophagy or mitophagy.

3 To test whether *dAtad3a* carrying R176W or L83V variants cause an increase in  
4 autophagy, we measured the levels of Ref(2)P, the *Drosophila* orthologue of p62, an autophagy  
5 marker, in adult muscles. While flies expressing R176W or L83V exhibited comparable levels of  
6 Ref(2)P as compared to wild type controls as young animals (7-day-old), the older (8 week old)  
7 mutants expressing R176W or L83V, exhibited significantly higher levels of Ref(2)P than those  
8 in wild-type controls (Figure 5B). We found that in muscles expressing R176W, most  
9 mitochondria marked by ATP5A were co-localized with Ref(2)P signals. We also found large  
10 vacuole-like structures that were void of ATP5A, but Ref(2)P positive in R176W muscles  
11 (Figure 5A, arrows, *dAtad3a*<sup>R176W</sup>). In muscles expressing L83V, we found a patch of higher  
12 Ref(2)P signals that were completely void of ATP5A (Figure 5A, arrows, *dAtad3a*<sup>L83V</sup>),  
13 suggesting that mitochondria with higher Ref(2)P underwent mitophagy and were degraded  
14 through autophagosomes. To further characterize this, we performed transmission electron  
15 microscopy (TEM). TEM in 56-day-old animals revealed that R176W led to small mitochondria  
16 and increased autophagic intermediates, whereas wildtype rescue animals exhibited normal  
17 mitochondria with lower numbers of autophagic intermediates (Figure 6A and 6B). Interestingly,  
18 muscles expressing L83V showed many normal mitochondria (Figure S4) but parts of muscles  
19 were filled with autophagic intermediates (Figure 6A and 6B, Figure S4), which is consistent  
20 with the Ref(2)P results (Figure 5A). In addition, we found that R176W and L83V cause small  
21 mitochondria with bar-shape cristae (Figure 6A, 6B) as well as distinctive cristae abnormalities –  
22 cristae are loosened and torn apart (Figure S4). Collectively, the data indicate that both R176W

1 and L83V variants lead to increased autophagy and mitochondria loss, and aberrant cristae, and  
2 that the detrimental effect of dAtad3a<sup>R176W</sup> is more severe than dAtad3a<sup>L83V</sup>.

3

4 Functional studies for the five missense variants in *Drosophila* were consistent with  
5 bioinformatic predictions, where the human variants p.(Leu77Val) and p.(Arg170Trp) had more  
6 benign prediction scores as compared to the other missense variants (**Table 2**). However, caution  
7 must be exercised with bioinformatics prediction scores, as the p.(Phe50Leu) variant also had a  
8 relatively low conservation score (GERPrs 1.95) yet was clearly pathogenic when tested *in vivo*.  
9 Indeed, the family with the most mild phenotype, Family 5, exhibited the p.(Arg170Trp) allele in  
10 *trans* to a frameshift variant (c.1141dup; p.(Val381Glyfs\*17). On the contrary, homozygosity for  
11 the p.(Arg327Pro) allele led to a severe, infantile lethal phenotype (Family 8). Genotype-  
12 phenotype correlations must take into account both alleles – the p.(Phe50Leu) allele was  
13 associated with a severe phenotype when inherited in *trans* to an intragenic deletion of two exons  
14 (Family 4); yet with a mild phenotype when observed with a nonframeshift single amino acid  
15 deletion (Family 7).

16

## 17 **DISCUSSION**

18 The spectrum of *ATAD3A* variants has thus far focused on monoallelic gain-of-function  
19 variants and biallelic loss-of-function variants. We report eight families with biallelic variants,  
20 ranging from biallelic CNVs to biallelic SNVs and combinations thereof. The relatively wide  
21 phenotypic and genotypic spectrum of *ATAD3A*-associated variation calls for caution in  
22 interpretation of the clinical significance of missense variants. To address this, we systematically

1 analyzed the functional effect of five missense variants identified in affected individuals using  
2 *Drosophila* models. We showed that F56L, G242V, and R333P are severe loss of function alleles  
3 which fail to rescue lethality of *dAtad3a* null mutants, whereas L83V and R176W are mild  
4 hypomorph variants which rescued developmental lethality, but exhibited behavioral defects in  
5 adult flies. Results from *Drosophila* studies correlated with the clinical severity of affected  
6 individuals – orthologs of the three more severe loss-of-function alleles (F56L, G242V, and  
7 R333P in *Drosophila*, or F50L, G236V, R327P in humans) led to severe phenotypes including  
8 hypotonia, global developmental delay, cataracts, cardiomyopathy and structural brain  
9 abnormalities (Families 4, 6, and 8). As noted in the results section, the F50L variant was  
10 identified in *trans* to a two exon deletion in Family 4, yielding a severe phenotype; yet was also  
11 identified in *trans* to a single amino acid deletion (nonframeshift) in Family 7, resulting in a  
12 more mild phenotype albeit with cataracts, cardiomyopathy, and cerebellar abnormalities. In  
13 contrast, one of the hypomorphic alleles (R176W in *Drosophila* or R170W in humans), when  
14 inherited in *trans* to a frameshift variant, led to a mild phenotype reminiscent of the first family  
15 reported with biallelic hypomorphic SNV.<sup>10</sup> This relatively weak variant (**Table 2 - Additional**  
16 **file 2**) may have been overlooked or discarded in variant filtering of the exome; nonetheless,  
17 functional modeling combined with a clinical phenotype compatible with the mild range of the  
18 *ATAD3A* disease spectrum, implicates the variant as probably disease-causing.

19 ATAD3A belongs to the AAA+ protein family. Members of this family form oligomers  
20 and have positive cooperativity in ATP binding and hydrolysis, whereby alteration of subunits  
21 (i.e. ATPase deficient mutants) affect the function of the entire protein complex.<sup>28</sup> Previous data  
22 from studies in *Drosophila* and in patient-derived fibroblasts with heterozygous variants (i.e.,  
23 p.Arg528Trp; R528W and p.Gly355Asp; G355D) suggested that both alleles act in a dominant-



1 negative fashion<sup>10, 14</sup>, consistent with that the mutated residues are located in the key motifs  
2 required for the ATPase activity (Gly355, the Walker A motif<sup>14</sup>; R528, the Sensor 2 motif,  
3 personal communication with Sukyoung Lee). Here we show that five SNVs (missense variants)  
4 act as hypomorphic or loss-of-function alleles rather than dominant-negative. Of five variants,  
5 four variants including L77V, F50L, R170W, and G236V are located outside of the AAA+  
6 domain (Figure 1C). Only Arg327 is located in the AAA+ domain (Figure 1D), which may  
7 impact the conformation of the AAA domain. However, human carriers for Arg327Pro (parents  
8 of family 8) are unaffected, suggesting that this allele seems not to affect the ATPase activity and  
9 does not function as dominant negative in humans. Western blot in flies showed that G236V  
10 (G242V in *Drosophila*) is a protein null (Figure 2D), consistent with severe loss of function of  
11 G242V *in vivo*. On the contrary, the other four alleles moderately or do not affect protein levels  
12 (Figure 2D), but rather lead to severe or partial loss of function of ATAD3A, suggesting the  
13 functional importance of the N-terminal and middle CC domains in ATAD3A. The first 50  
14 amino acids were reported to be important to form contact sites between the mitochondria and  
15 the endoplasmic reticulum (ER) membrane<sup>1</sup>, implicating that F50L variant may cause defects in  
16 mitochondria-ER communication. The CC domain was shown to bind to Drp1 and  
17 oligomerization of ATAD3A leads to Drp1 to the mitochondria via the CC domain, resulting in  
18 increased fission<sup>29</sup>. This suggests that R170W (R176W, *Drosophila*), located in the CC domain,  
19 leads to small mitochondria with increased autophagosome (Figure 6B) via an increased  
20 interaction with Drp1. Further molecular studies of the pathogenic variants and identification of  
21 ATAD3A-interacting proteins will provide insight as to how genetic variants cause the etiology  
22 at the molecular and cellular levels.

1 Previous studies in *Drosophila* and in patient-derived fibroblasts with heterozygous  
2 variants (i.e., p.Arg528Trp and p.Gly355Asp) revealed a defect in mitochondrial dynamics,  
3 possibly triggering mitophagy and resulting in a significant reduction of mitochondria.<sup>10</sup> Here we  
4 also demonstrated that aged muscles expressing R176W, and L83V variants exhibited defective  
5 mitochondrial membrane dynamics and increased mitophagic vesicles (Figure 6). Thus, these  
6 findings suggest that proper ATAD3A function is required for homeostasis of mitochondrial  
7 dynamics and mitophagy. One mechanism for mitophagy was documented in mouse  
8 hematopoietic stem cells, in which increased mitophagy in *ATAD3A*-deficient cells, has been  
9 attributed to perturbation of Pink1-mediated mitophagy.<sup>30</sup> Abnormal regulation of nutrition and  
10 metabolism-sensing machineries such as mechanistic target of rapamycin (mTOR) could be  
11 implicated in the etiology caused by loss of ATAD3A as mTOR is a major regulator for  
12 autophagy and mitophagy. Indeed, Cooper et al. (2017) demonstrated upregulated basal  
13 autophagy in patient fibroblasts, associated with mTOR inactivation.<sup>14</sup> In mice, *Atad3a* and  
14 mTOR have central functions in biogenesis of mitochondria during development.<sup>2; 3; 31</sup> Target of  
15 rapamycin (TOR) signaling positively regulates mitochondrial activity, and the *Drosophila*  
16 paralog of *ATAD3A* (*bor*) is downregulated upon rapamycin-dependent inhibition of TOR  
17 signaling pathways.<sup>32</sup> Thus, altered mTOR signaling may also contribute to the pathogenesis of  
18 *ATAD3A*-related disorders and targeting mTOR activity could be a potential therapeutic avenue  
19 for alleviating symptoms caused by *ATAD3A* mutations.

20 In addition to altered mitochondrial dynamics, increased mitophagy and mTOR  
21 inactivation in *ATAD3A*-deficient cells,<sup>14, 30</sup> alternative pathogenetic mechanisms for *ATAD3A*-  
22 associated disorders have been proposed.<sup>29</sup> These include impaired mtDNA and segregation, and  
23 aberrant cholesterol channeling and steroidogenesis.<sup>33-35</sup> mtDNA co-sediments with cholesterol,

1 and both mitochondrial integrity and cholesterol metabolism have been linked to  
2 neurodegeneration and cerebellar pathology.<sup>12</sup> Fibroblasts from individuals with biallelic *ATAD3*  
3 locus deletions displayed enlarged and more numerous mitochondrial DNA (mtDNA) foci,  
4 suggesting that *ATAD3A* deficiency causes localized mtDNA aggregation or impairs its proper  
5 distribution. Moreover, fibroblasts demonstrated multiple indicators of altered cholesterol  
6 metabolism.<sup>12</sup> The associated disease pathology was proposed to result either from compromised  
7 rigidity of the inner mitochondrial membrane with impaired mtDNA segregation subsequent to  
8 inadequate cholesterol metabolism, or from a shortage of cholesterol products in Purkinje cells.  
9 Affected individuals whose fibroblasts exhibited impaired cholesterol metabolism often  
10 presented with elevated urine levels of 3-methylglutaconic acid (3-MGA).<sup>10, 12, 15</sup> Interestingly,  
11 *SERAC1* deficiency presents with impaired cholesterol metabolism together with elevated 3-  
12 MGA levels<sup>37</sup>, suggesting that defective cholesterol metabolism and mitochondrial lipid  
13 metabolism may be implicated in increased levels of 3-MGA. Whether manipulating cholesterol  
14 metabolism and mitochondrial lipid metabolism ameliorate *ATAD3A* pathologies remains to be  
15 investigated.

## 16 CONCLUSIONS

17 *Drosophila* has been well established as a powerful genetic model organism.<sup>36</sup> We  
18 utilized this model organism to assess functional impacts of various missense variants in  
19 *ATAD3A*, and showed that the allele severity in *Drosophila* correlates with the phenotypic  
20 severity in humans. We contribute to the growing disease-causing allelic spectrum at the  
21 *ATAD3A* locus, which includes biallelic NAHR-mediated deletions and a reciprocal monoallelic  
22 duplication; monoallelic dominant-negative variants, biallelic SNVs, and now SNVs in trans to  
23 deletion alleles.

## 1 LIST OF ABBREVIATIONS

2 AAA-domain containing protein 3A, ATAD3A; ATPases associated with diverse cellular  
3 activities, AAA+ ATPase; *belphegor*, *bor*; nonallelic homologous recombination, NAHR; copy  
4 number variants, CNV; single nucleotide variants, SNV; *Drosophila Atad3a*, *dAtad3a*; Upstream  
5 Activating Sequence; UAS; ventral nerve cord, VNC; central nervous system, CNS; peripheral  
6 nervous system, PNS; transmission electron microscopy, TEM

## 7 DECLARATIONS

### 8 Ethics approval and consent to participate

9 Our patients' samples were provided for genomic analysis as an NHS diagnostic test (Family 1,  
10 7, 8) and Technische Universitaet Muenchen (5360/12 S) (Family 2, 4, 5, and 6). The parents  
11 provided consent for genetic testing and publication of the results.

### 12 Availability of data and materials

13 The datasets generated and/or analysed during the current study are available from the  
14 corresponding author on reasonable request.

### 15 Competing Interests

16 Declaration of Interests: J.R.L. has stock ownership in 23andMe, is a paid consultant for  
17 Regeneron Pharmaceuticals, and is a co-inventor on multiple United States and European patents  
18 related to molecular diagnostics for inherited neuropathies, eye diseases, and bacterial genomic  
19 fingerprinting. The Department of Molecular and Human Genetics at Baylor College of

1 Medicine receives revenue from clinical genetic testing conducted at Baylor Genetics (BG)  
2 Laboratories. J.R.L. is serves on the Scientific Advisory Board of BG. Other authors have no  
3 potential conflicts to report.

#### 4 **Funding**

5 TH is supported by the Israel Science Foundation grant 1663/17. WY is supported by the  
6 National Institute of General Medical Sciences of the National Institutes of Health through grant  
7 5 P20 GM103636-07. JRL is supported by the US National Institute of Neurological Disorders  
8 and Stroke (R35NS105078). SBW is supported by The Anniversary Fund of the Oesterreichische  
9 Nationalbank (OeNB, #18023).

#### 10 **Author's contributions**

11 ZYY, and YP performed Drosophila experiments and provided figures. SBW, ACG, EW, KW,  
12 JAM, HL, UK, EDB, SE, and DW DSW contributed to acquisition and analysis of human  
13 genetics and clinical data. SL performed in silico structural prediction of genetic variants. LD  
14 performed EM. JRL contributed ideas for critical writing. TH and WY conceived and designed  
15 the project. TH collected and analyzed all clinical and genetic data, and wrote and revised the  
16 manuscript. WY designed and supervised the in vitro and Drosophila work, wrote and revised  
17 the manuscript. All authors edited the final manuscript.

18

#### 19 **ACKNOWLEDGEMENTS**

20 The authors wish to thank the families for their participation in this study. We appreciate Dr.  
21 Hugo Bellen for his generous technical support. We appreciate Dr. Scott Plafker for critical

1 reading of this manuscript. We appreciate Dr. Sheng Zhang's kind gift of rabbit anti-Ref2(P)  
2 antibodies.

3

#### 4 **FIGURE LEGENDS**

##### 5 **Figure 1. Identification of Patients with Neurological Phenotypes with Variants in** 6 ***ATAD3A***

7 (A) Pedigrees of studied families, indicating biallelic variants in *ATAD3A* identified in 13  
8 individuals from 8 families, indicating biallelic deletion in family 1 and 2, loss-of-function  
9 alleles (intergenic CNV, intragenic CNV, or frameshift SNV) inherited in *trans* to a missense  
10 variant in Families 3-7, homozygous missense variant in Family 8. (B) Protein sequence  
11 alignment in multiple species confirms evolutionary conservation of p.L77V, p.F50L, p.R170W,  
12 p.G236V, p.R327P, in both humans and *Drosophila*. (C) Schematic representation of protein  
13 domains of human *ATAD3A*. CC indicates coiled-coil domain. TM indicates putative  
14 transmembrane domain. Green indicate AAA+ domain containing Walker A motif (WA) and  
15 Walker B motif (WB). (D) In silico protein structure prediction of *ATAD3A* shows position of  
16 mutated residues.

##### 17 **Figure 2. *Drosophila Atad3a* models shows various strength of *ATAD3A* missense variants**

18 (A) A schematic of the generation of *dAtad3a-T2A-Gal4* by CRISPR-Cas9 gene editing, and the  
19 translation of a Gal4 protein by a ribosomal skipping mechanism. The location of the *attP-SA-*  
20 *T2A-Gal4-polyA-attP* cassette insertion into the *dAtad3a* genomic locus is indicated by the  
21 dotted lines. The T2A-Gal4 cassette consists of a splice acceptor (SA, light gray) followed by a

1 ribosomal skipping T2A peptide sequence (pink), a Gal4 coding sequence (green), a  
2 polyadenylation signal (light blue). Two inverted *attB* sites (blue) are positioned at the 5'- and  
3 3'- end of the cassette. (B) Expression of *UAS-mCD8::GFP* under the control of *dAtad3a-T2A-*  
4 *Gal4* is monitored in larvae and adult flies. (C) Complementation test results of *dAtad3a-T2A-*  
5 *Gal4* alleles. +, complement; -, failure to complement. *dAtad3a-T2A-Gal4* fails to complement a  
6 deficiency (*Df(3R)Excel7329*) that lacks the *dAtad3a* locus and *PBac{PB}dAtad3ac05496* null  
7 allele, which were rescued by expression of wildtype *dAtad3a* cDNA. These data indicate that  
8 *dAtad3a-T2A-Gal4* is a loss-of-function mutant. (D) Western blots for fly heads expressing  
9 wildtype dAtad3a-V5, or dAtad3a-V5 carrying homologous missense mutations identified from  
10 patients. Three replicates were quantified. Error bars indicate SEM. P values were calculated  
11 using Student's t-test. \**P* <0.05, \*\*\**P* <0.001. (E) The lethality caused by *dAtad3a* loss was  
12 rescued by expression of wild-type *dAtad3a*, and *dAtad3a* carrying L83V, or R176W, but not by  
13 those carrying F56L, G242V, or R333P.

14 **Figure 3. Loss of Atad3a, and F56L, G242V, and R333P variants lead to severe**  
15 **neurodevelopmental defects**

16 (A) Confocal micrographs of *dAtad3a* null mutant embryos and those expressing *dAtad3a<sup>WT</sup>*,  
17 *dAtad3a<sup>F56L</sup>*, *dAtad3a<sup>G242V</sup>*, *dAtad3a<sup>R333P</sup>*. Elav (green) stained neurons, and anti-HRP (red)  
18 stained neuronal membranes. Br indicates brain, and VNC indicates ventral nerve cord.  
19 Arrowheads indicate shrunken, and twisted VNC. Arrows indicate misguided and loss of neurons  
20 in the PNS. Scale bars indicate 100  $\mu$ m. (B) Quantification of CNS and PNS phenotypes shown  
21 in mutant embryos. Numbers of embryos for these analyses are as followed: CNS – wt (n=58),  
22 null (96), F56L (n=53), G242V (n=71), and R333P (n=60). PNS - wt (n=52), null (86), F56L  
23 (n=52), G242V (n=59), and R333P (n=44).

1 **Figure 4. L83V and R175W variants cause behavioral defects in adult flies**

2 (A) *dAtad3a* null mutant flies expressing L83V, and R176W were short lived compared to  
3 wildtype rescue animals. (B) *dAtad3a* null mutant flies expressing L83V, and R176W exhibited  
4 progressive climbing defects compared to wildtype rescue controls. (C) *dAtad3a* null mutant  
5 flies expressing R176W exhibited defects in flight ability in 5<sup>th</sup> day of their life and complete  
6 failure of flight in 35<sup>th</sup> day. *dAtad3a* mutant flies expressing L83V exhibited progressive decline  
7 of flight ability compared to rescue controls. (B, C) Three biological replicates (25 flies per  
8 group) were quantified. Error bars indicate SEM. P values were calculated using Student's t-test.  
9 \**P* <0.05, \*\*\**P* <0.001.

10 **Figure 5. L83V and R175W variants cause increased p62 levels in thorax in aged flies.**

11 (A) Confocal micrographs of thorax muscle from 8 week-old flies - *dAtad3a* null mutants  
12 expressing *dAtad3a*<sup>WT</sup>, *dAtad3a*<sup>R176W</sup>, or *dAtad3a*<sup>L83V</sup>. ATP5A (green) labels mitochondria.  
13 Ref(2)P, is the *Drosophila* homolog of p62 (red). Arrows indicate Ref(2)P signals with absence  
14 of ATP5A signals. Scale bars indicate 100 μm. (B) Western blots for the protein levels of  
15 Ref(2)P, ATP5A and Actin from *dAtad3a* mutant fly thoraxes expressing *dAtad3a*<sup>WT</sup>,  
16 *dAtad3a*<sup>R176W</sup>, or *dAtad3a*<sup>L83V</sup> (n=10 per genotype). (C) Quantification of Ref(2)P and (D)  
17 ATP5A level. Ref(2)P and ATP5A were normalized by Actin. Three biological replicates were  
18 quantified. Error bars indicate SEM. P values were calculated using Student's t-test. \**P* <0.05,  
19 \*\**P* <0.01. \*\*\**P* <0.001.

20 **Figure 6. L83V and R175W variants cause aberrant mitochondrial morphology, increased**  
21 **autophagic and mitophagic vesicles**



1 (A) Electron micrographs of thorax muscles from 8 week old *dAtad3a* mutant flies expressing  
2 *dAtad3a*<sup>WT</sup>, *dAtad3a*<sup>R176W</sup>, or *dAtad3a*<sup>L83V</sup>. Arrows show autophagosomes (i, ii and v),  
3 autolysosomes (v and viii), lysosomes (vi and ix), and mitophagosomes (iv and vii). Scale bars  
4 indicate 600 nm. (B) Quantification of mitochondria size, mitochondria phenotypes, numbers of  
5 autophagosome, autolysosome, lysosome and mitophagosome. Respective number of vesicles  
6 were normalized by observed area ( $\mu\text{m}^2$ ). Error bars indicate SEM. P values were calculated  
7 using Student's t-test. \**P* <0.05, \*\*\**P* <0.001.

8

9

10

11

## 1 REFERENCES

- 2 1. Gilquin, B., Taillebourg, E., Cherradi, N., Hubstenberger, A., Gay, O., Merle, N., Assard, N.,  
3 Fauvarque, M.O., Tomohiro, S., Kuge, O., et al. (2010). The AAA+ ATPase ATAD3A  
4 controls mitochondrial dynamics at the interface of the inner and outer membranes. *Mol*  
5 *Cell Biol* 30, 1984-1996.
- 6 2. Baudier, J. (2017). ATAD3 proteins: brokers of a mitochondria-endoplasmic reticulum  
7 connection in mammalian cells. *Biol Rev Camb Philos Soc*.
- 8 3. Goller, T., Seibold, U.K., Kremmer, E., Voos, W., and Kolanus, W. (2013). Atad3 function is  
9 essential for early post-implantation development in the mouse. *PLoS One* 8, e54799.
- 10 4. Hoffmann, M., Bellance, N., Rossignol, R., Koopman, W.J., Willems, P.H., Mayatepek, E.,  
11 Bossinger, O., and Distelmaier, F. (2009). *C. elegans* ATAD-3 is essential for  
12 mitochondrial activity and development. *PLoS One* 4, e7644.
- 13 5. Fang, H.Y., Chang, C.L., Hsu, S.H., Huang, C.Y., Chiang, S.F., Chiou, S.H., Huang, C.H.,  
14 Hsiao, Y.T., Lin, T.Y., Chiang, I.P., et al. (2010). ATPase family AAA domain-  
15 containing 3A is a novel anti-apoptotic factor in lung adenocarcinoma cells. *J Cell Sci*  
16 123, 1171-1180.
- 17 6. Li, S., Lamarche, F., Charton, R., Delphin, C., Gires, O., Hubstenberger, A., Schlattner, U.,  
18 and Rousseau, D. (2014). Expression analysis of ATAD3 isoforms in rodent and human  
19 cell lines and tissues. *Gene* 535, 60-69.
- 20 7. Teng, Y., Ren, X., Li, H., Shull, A., Kim, J., and Cowell, J.K. (2016). Mitochondrial  
21 ATAD3A combines with GRP78 to regulate the WASF3 metastasis-promoting protein.  
22 *Oncogene* 35, 333-343.
- 23 8. You, W.C., Chiou, S.H., Huang, C.Y., Chiang, S.F., Yang, C.L., Sudhakar, J.N., Lin, T.Y.,  
24 Chiang, I.P., Shen, C.C., Cheng, W.Y., et al. (2013). Mitochondrial protein ATPase  
25 family, AAA domain containing 3A correlates with radioresistance in glioblastoma.  
26 *Neuro Oncol* 15, 1342-1352.
- 27 9. Stankiewicz, P., and Lupski, J.R. (2002). Genome architecture, rearrangements and genomic  
28 disorders. *Trends Genet* 18, 74-82.
- 29 10. Harel, T., Yoon, W.H., Garone, C., Gu, S., Coban-Akdemir, Z., Eldomery, M.K., Posey, J.E.,  
30 Jhangiani, S.N., Rosenfeld, J.A., Cho, M.T., et al. (2016). Recurrent De Novo and  
31 Biallelic Variation of ATAD3A, Encoding a Mitochondrial Membrane Protein, Results in  
32 Distinct Neurological Syndromes. *Am J Hum Genet* 99, 831-845.
- 33 11. Peeters-Scholte, C.M.P.C., Adama van Scheltema, P.N., Klumper, F.J.C.M., Everwijn,  
34 S.M.P., Koopmans, M., Hoffer, M.J.V., Koopmann, T.T., Ruivenkamp, C.A.L.,  
35 Steggerda, S.J., van der Knaap, M.S., et al. (2017). Genotype-phenotype correlation in  
36 ATAD3A deletions: not just of scientific relevance. *Brain* 140, e66.
- 37 12. Desai, R., Frazier, A.E., Durigon, R., Patel, H., Jones, A.W., Dalla Rosa, I., Lake, N.J.,  
38 Compton, A.G., Mountford, H.S., Tucker, E.J., et al. (2017). ATAD3 gene cluster  
39 deletions cause cerebellar dysfunction associated with altered mitochondrial DNA and  
40 cholesterol metabolism. *Brain* 140, 1595-1610.
- 41 13. Frazier, A.E., Holt, I.J., Spinazzola, A., and Thorburn, D.R. (2017). Reply: Genotype-  
42 phenotype correlation in ATAD3A deletions: not just of scientific relevance. *Brain* 140,  
43 e67.

- 1 14. Cooper, H.M., Yang, Y., Ylikallio, E., Khairullin, R., Woldegebriel, R., Lin, K.L., Euro, L.,  
2 Palin, E., Wolf, A., Trokovic, R., et al. (2017). ATPase-deficient mitochondrial inner  
3 membrane protein ATAD3A disturbs mitochondrial dynamics in dominant hereditary  
4 spastic paraplegia. *Hum Mol Genet* 26, 1432-1443.
- 5 15. Gunning, A.C., Strucinska, K., Muñoz Oreja, M., Parrish, A., Caswell, R., Stals, K.L.,  
6 Durigon, R., Durlacher-Betzer, K., Cunningham, M.H., Grochowski, C.M., et al. (2020).  
7 Recurrent De Novo NAHR Reciprocal Duplications in the ATAD3 Gene Cluster Cause a  
8 Neurogenetic Trait with Perturbed Cholesterol and Mitochondrial Metabolism. *Am J*  
9 *Hum Genet* 106, 272-279.
- 10 16. Al Madhoun, A., Alnaser, F., Melhem, M., Nizam, R., Al-Dabbous, T., and Al-Mulla, F.  
11 (2019). Ketogenic diet attenuates cerebellar atrophy progression in a subject with a  
12 biallelic variant at the. *Appl Clin Genet* 12, 79-86.
- 13 17. Stals, K.L., Wakeling, M., Baptista, J., Caswell, R., Parrish, A., Rankin, J., Tysoe, C., Jones,  
14 G., Gunning, A.C., Lango Allen, H., et al. (2018). Diagnosis of lethal or prenatal-onset  
15 autosomal recessive disorders by parental exome sequencing. *Prenat Diagn* 38, 33-43.
- 16 18. Wagner, M., Berutti, R., Lorenz-Depiereux, B., Graf, E., Eckstein, G., Mayr, J.A., Meitinger,  
17 T., Ahting, U., Prokisch, H., Strom, T.M., et al. (2019). Mitochondrial DNA mutation  
18 analysis from exome sequencing-A more holistic approach in diagnostics of suspected  
19 mitochondrial disease. *J Inherit Metab Dis* 42, 909-917.
- 20 19. Roy, A., Kucukural, A., and Zhang, Y. (2010). I-TASSER: a unified platform for automated  
21 protein structure and function prediction. *Nat Protoc* 5, 725-738.
- 22 20. Kondo, S., and Ueda, R. (2013). Highly improved gene targeting by germline-specific Cas9  
23 expression in *Drosophila*. *Genetics* 195, 715-721.
- 24 21. Lee, P.T., Zirin, J., Kanca, O., Lin, W.W., Schulze, K.L., Li-Kroeger, D., Tao, R.,  
25 Devereaux, C., Hu, Y., Chung, V., et al. (2018). A gene-specific T2A-Gal4 Library for  
26 *Drosophila*. *Elife* 7.
- 27 22. Diao, F., Ironfield, H., Luan, H., Shropshire, W.C., Ewer, J., Marr, E., Potter, C.J., Landgraf,  
28 M., and White, B.H. (2015). Plug-and-play genetic access to *drosophila* cell types using  
29 exchangeable exon cassettes. *Cell Rep* 10, 1410-1421.
- 30 23. Bischof, J., Maeda, R.K., Hediger, M., Karch, F., and Basler, K. (2007). An optimized  
31 transgenesis system for *Drosophila* using germ-line-specific phiC31 integrases. *Proc Natl*  
32 *Acad Sci U S A* 104, 3312-3317.
- 33 24. Pesah, Y., Pham, T., Burgess, H., Middlebrooks, B., Verstreken, P., Zhou, Y., Harding, M.,  
34 Bellen, H., and Mardon, G. (2004). *Drosophila* parkin mutants have decreased mass and  
35 cell size and increased sensitivity to oxygen radical stress. *Development* 131, 2183-2194.
- 36 25. Madabattula, S.T., Strautman, J.C., Bysice, A.M., O'Sullivan, J.A., Androschuk, A.,  
37 Rosenfelt, C., Doucet, K., Rouleau, G., and Bolduc, F. (2015). Quantitative Analysis of  
38 Climbing Defects in a *Drosophila* Model of Neurodegenerative Disorders. *J Vis Exp*,  
39 e52741.
- 40 26. Yachdav, G., Kloppmann, E., Kajan, L., Hecht, M., Goldberg, T., Hamp, T., Hönigschmid,  
41 P., Schafferhans, A., Roos, M., Bernhofer, M., et al. (2014). PredictProtein--an open  
42 resource for online prediction of protein structural and functional features. *Nucleic Acids*  
43 *Res* 42, W337-343.
- 44 27. Richards, S., Aziz, N., Bale, S., Bick, D., Das, S., Gastier-Foster, J., Grody, W.W., Hegde,  
45 M., Lyon, E., Spector, E., et al. (2015). Standards and guidelines for the interpretation of  
46 sequence variants: a joint consensus recommendation of the American College of

- 1 Medical Genetics and Genomics and the Association for Molecular Pathology. *Genet*  
2 *Med* 17, 405-424.
- 3 28. Puchades, C., Sandate, C.R., and Lander, G.C. (2020). The molecular principles governing  
4 the activity and functional diversity of AAA+ proteins. *Nat Rev Mol Cell Biol* 21, 43-58.
- 5 29. Zhao, Y., Sun, X., Hu, D., Prosdocimo, D.A., Hoppel, C., Jain, M.K., Ramachandran, R., and  
6 Qi, X. (2019). ATAD3A oligomerization causes neurodegeneration by coupling  
7 mitochondrial fragmentation and bioenergetics defects. *Nat Commun* 10, 1371.
- 8 30. Jin, G., Xu, C., Zhang, X., Long, J., Rezaeian, A.H., Liu, C., Furth, M.E., Kridel, S., Pasche,  
9 B., Bian, X.W., et al. (2018). Atad3a suppresses Pink1-dependent mitophagy to maintain  
10 homeostasis of hematopoietic progenitor cells. *Nat Immunol* 19, 29-40.
- 11 31. Murakami, M., Ichisaka, T., Maeda, M., Oshiro, N., Hara, K., Edenhofer, F., Kiyama, H.,  
12 Yonezawa, K., and Yamanaka, S. (2004). mTOR is essential for growth and proliferation  
13 in early mouse embryos and embryonic stem cells. *Mol Cell Biol* 24, 6710-6718.
- 14 32. Guertin, D.A., Guntur, K.V., Bell, G.W., Thoreen, C.C., and Sabatini, D.M. (2006).  
15 Functional genomics identifies TOR-regulated genes that control growth and division.  
16 *Curr Biol* 16, 958-970.
- 17 33. He, J., Cooper, H.M., Reyes, A., Di Re, M., Sembongi, H., Litwin, T.R., Gao, J., Neuman,  
18 K.C., Fearnley, I.M., Spinazzola, A., et al. (2012). Mitochondrial nucleoid interacting  
19 proteins support mitochondrial protein synthesis. *Nucleic Acids Res* 40, 6109-6121.
- 20 34. Issop, L., Fan, J., Lee, S., Rone, M.B., Basu, K., Mui, J., and Papadopoulos, V. (2015).  
21 Mitochondria-associated membrane formation in hormone-stimulated Leydig cell  
22 steroidogenesis: role of ATAD3. *Endocrinology* 156, 334-345.
- 23 35. Rone, M.B., Midzak, A.S., Issop, L., Rammouz, G., Jagannathan, S., Fan, J., Ye, X.,  
24 Blonder, J., Veenstra, T., and Papadopoulos, V. (2012). Identification of a dynamic  
25 mitochondrial protein complex driving cholesterol import, trafficking, and metabolism to  
26 steroid hormones. *Mol Endocrinol* 26, 1868-1882.
- 27 36. Bellen, H.J., Wangler, M.F., and Yamamoto, S. (2019). The fruit fly at the interface of  
28 diagnosis and pathogenic mechanisms of rare and common human diseases. *Hum Mol*  
29 *Genet* 28, R207-R214.
- 30 37. Wortmann, S. B., Vaz, F. M., Gardeitchik, T., Vissers, L. E., Renkema, G. H., Schuurs-  
31 Hoeijmakers, J. H., Kulik, W., Lammens, M., Christin, C., Kluijtmans, L. A., et al.  
32 (2012). Mutations in the phospholipid remodeling gene SERAC1 impair mitochondrial  
33 function and intracellular cholesterol trafficking and cause dystonia and deafness. *Nat*  
34 *Genet* 44, 797-802

35

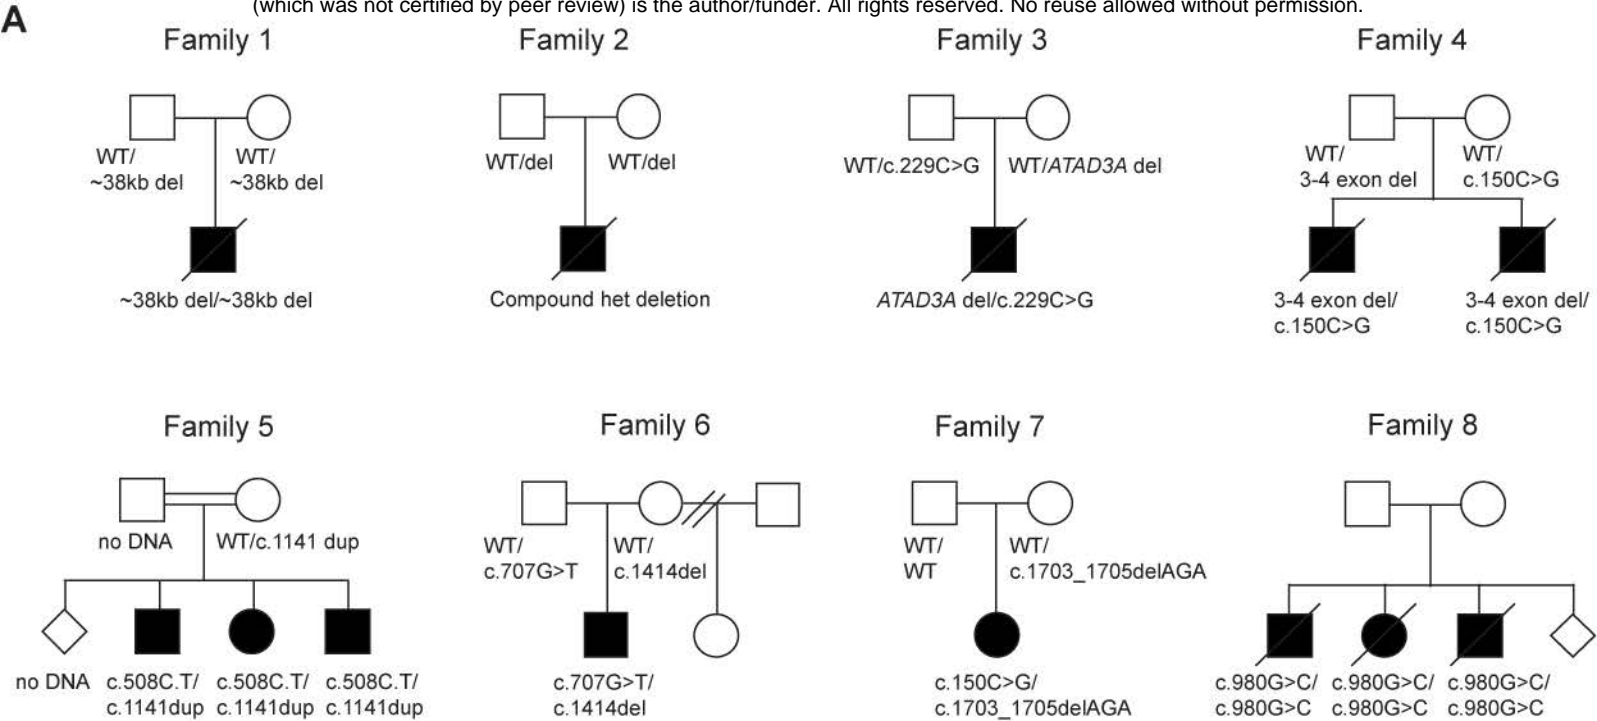

**B** Evolutionary conservatoin of the missense variants in *ATAD3A*

|                                                                                                                                                                                                                                                                                                                                                                                                                            |                                                                                                                                                                                                                                                                                                                                                                                       |                                                                                                                                                                                                                                                                                                                                                                                                                                                    |
|----------------------------------------------------------------------------------------------------------------------------------------------------------------------------------------------------------------------------------------------------------------------------------------------------------------------------------------------------------------------------------------------------------------------------|---------------------------------------------------------------------------------------------------------------------------------------------------------------------------------------------------------------------------------------------------------------------------------------------------------------------------------------------------------------------------------------|----------------------------------------------------------------------------------------------------------------------------------------------------------------------------------------------------------------------------------------------------------------------------------------------------------------------------------------------------------------------------------------------------------------------------------------------------|
| <p>Family 3</p> <p><b>L77V</b></p> <p><i>H. sapiens</i> AKDALN<b>L</b>LAQM<b>Q</b>EQT<br/> <i>M. musculus</i> AKEALS<b>L</b>LAQM<b>Q</b>EQT<br/> <i>D. rerio</i> AKEAL<b>D</b>LARM<b>Q</b>EQT<br/> <i>D. melanogaster</i> AREALE<b>L</b>SKM<b>Q</b>EAT<br/> <i>C. elegans</i> AKEALE<b>L</b>SRM<b>Q</b>EVT<br/>         * : : * : : * : : * : : *</p>                                                                      | <p>Family 4 and 7</p> <p><b>F50L</b></p> <p><i>H. sapiens</i> PKDKWSN<b>F</b>DPTGLERAAK<br/> <i>M. musculus</i> PKDKWSN<b>F</b>DPTGLERAAK<br/> <i>D. rerio</i> PKDKWSN<b>F</b>DPTGLERAAQ<br/> <i>D. melanogaster</i> KAMEAY<b>R</b>FDSSALERAAD<br/> <i>C. elegans</i> NSKMAY<b>S</b>FDSTALERAAK<br/>         * : : * : : * : : * : : *</p>                                            | <p>Family 5</p> <p><b>R170W</b></p> <p><i>H. sapiens</i> VQ<b>Q</b>QEAM<b>R</b>RAT<b>V</b>EREM<br/> <i>M. musculus</i> VQ<b>Q</b>QEAI<b>R</b>RAT<b>V</b>EREM<br/> <i>D. rerio</i> VQ<b>Q</b>QEAM<b>R</b>RAT<b>I</b>EH<b>E</b>M<br/> <i>D. melanogaster</i> VQ<b>R</b>QEAM<b>R</b>RQ<b>T</b>IE<b>H</b>E<b>I</b><br/> <i>C. elegans</i> V<b>K</b>Q<b>Q</b>E<b>Q</b>LR<b>K</b>Q<b>T</b>IE<b>H</b>E<b>L</b><br/>         * : : * : : * : : * : : *</p> |
| <p>Family 6</p> <p><b>G236V</b></p> <p><i>H. sapiens</i> AGTL<b>F</b>GE<b>G</b>FRAF<b>V</b>TD<br/> <i>M. musculus</i> AGTL<b>L</b>GE<b>G</b>FRAF<b>V</b>TD<br/> <i>D. rerio</i> AGAV<b>F</b>GE<b>G</b>FRAF<b>I</b>SD<br/> <i>D. melanogaster</i> AG<b>T</b>VI<b>G</b>AG<b>A</b>E<b>A</b>ML<b>T</b>D<br/> <i>C. elegans</i> SG<b>E</b>LI<b>G</b>SG<b>L</b>N<b>Q</b>FL<b>N</b>D<br/>         : * : : * : : * : : * : : *</p> | <p>Family 8</p> <p><b>R327P</b></p> <p><i>H. sapiens</i> LSP<b>S</b>LE<b>A</b>R<b>V</b>RDIAIA<br/> <i>M. musculus</i> LSP<b>S</b>LE<b>A</b>R<b>V</b>RDIAIA<br/> <i>D. rerio</i> LSP<b>P</b>LE<b>E</b>R<b>V</b>RDIAIA<br/> <i>D. melanogaster</i> LNP<b>K</b>LE<b>E</b>R<b>L</b>RDIAIA<br/> <i>C. elegans</i> LPP<b>A</b>LE<b>R</b>RLRDIAIT<br/>         * : : * : : * : : * : : *</p> |                                                                                                                                                                                                                                                                                                                                                                                                                                                    |

**C** Domains of human *ATAD3A* protein

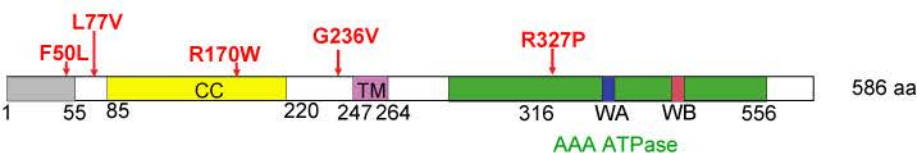

**D** Homology model of *ATAD3A* with the missense variants

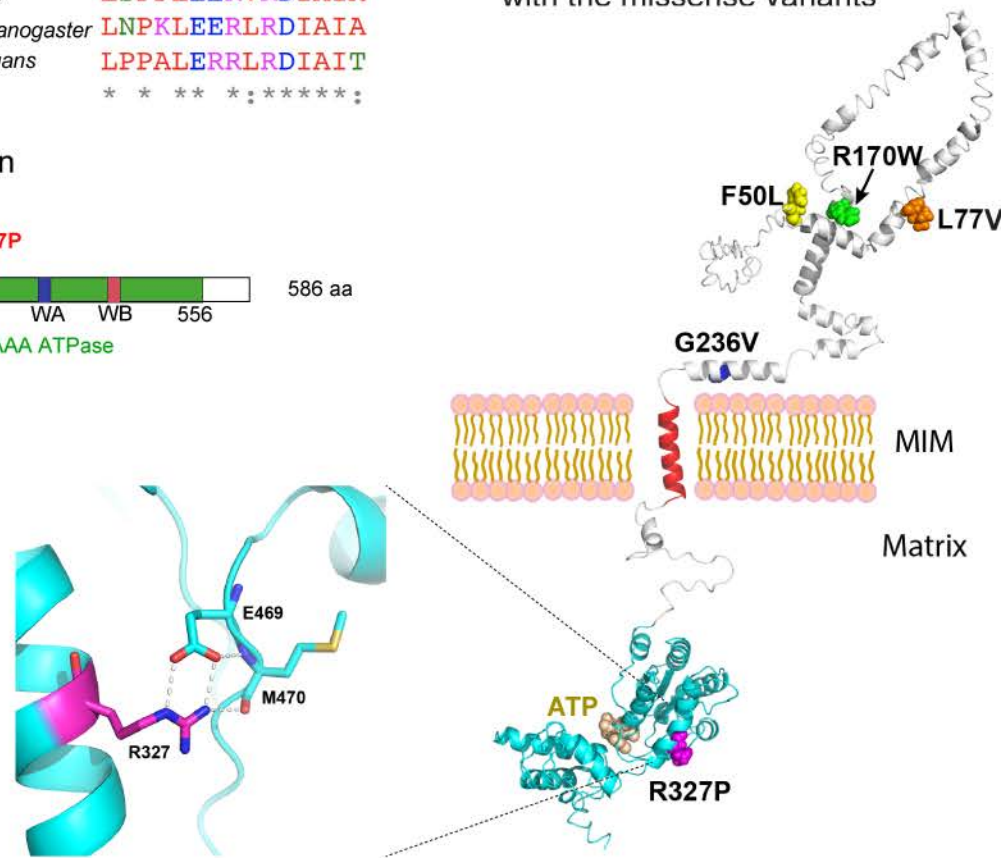

**Figure 1**

## A CRISPR/Cas9-mediated T2A-Gal4 cassette insertion in *dAtad3a* genomic locus

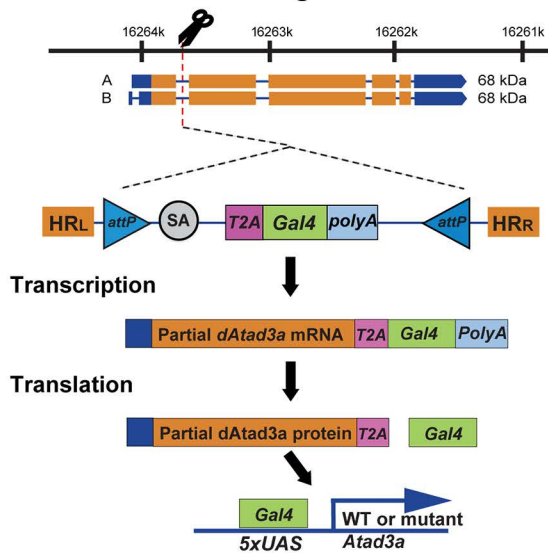

## B Expression of *dAtad3a*

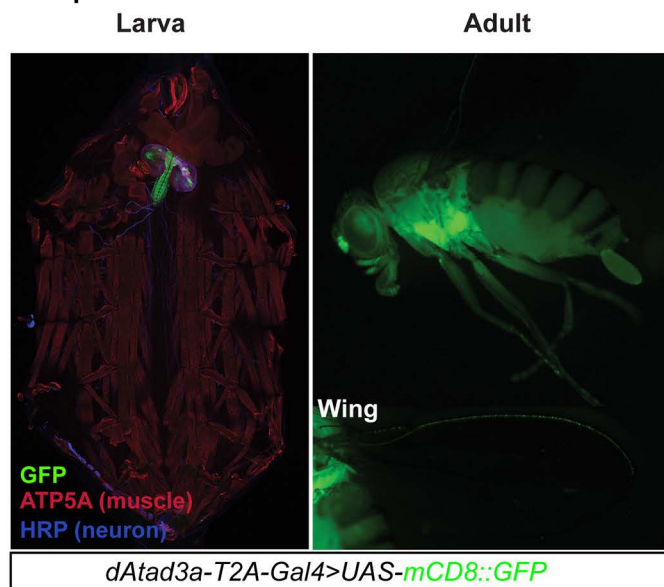

## C *dAtad3a-T2A-Gal4* is null allele

### Complementation Test for *dAtad3a*<sup>T2A-Gal4</sup>

| Genotypes                                                                                                 | Rescue of lethality |
|-----------------------------------------------------------------------------------------------------------|---------------------|
| <i>PBac{PB}dAtad3a</i> <sup>c05496</sup><br><i>dAtad3a-T2A-Gal4</i>                                       | -                   |
| <i>UAS-dAtad3a</i> <sup>WT</sup> ;<br><i>PBac{PB}dAtad3a</i> <sup>c05496</sup><br><i>dAtad3a-T2A-Gal4</i> | +                   |
| <i>Df(3R)Excel7329</i><br><i>dAtad3a-T2A-Gal4</i>                                                         | -                   |
| <i>UAS-dAtad3a</i> <sup>WT</sup> ;<br><i>Df(3R)Excel7329</i><br><i>dAtad3a-T2A-Gal4</i>                   | +                   |

## D Protein stability of *dAtad3a* mutants

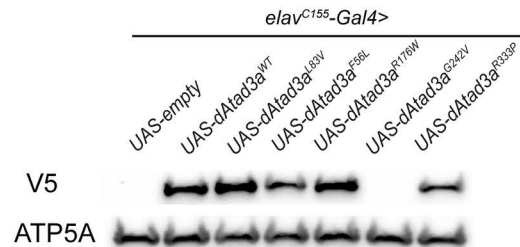

## E Functional test for five *ATAD3A* missense variant using *dAtad3a-T2A-Gal4* allele

| Genotypes                                                                                                    | Rescue of lethality |
|--------------------------------------------------------------------------------------------------------------|---------------------|
| <i>UAS-dAtad3a</i> <sup>WT</sup> ;<br><i>PBac{PB}dAtad3a</i> <sup>c05496</sup><br><i>dAtad3a-T2A-Gal4</i>    | +                   |
| <i>UAS-dAtad3a</i> <sup>L83V</sup> ;<br><i>PBac{PB}dAtad3a</i> <sup>c05496</sup><br><i>dAtad3a-T2A-Gal4</i>  | +                   |
| <i>UAS-dAtad3a</i> <sup>F56L</sup> ;<br><i>PBac{PB}dAtad3a</i> <sup>c05496</sup><br><i>dAtad3a-T2A-Gal4</i>  | -                   |
| <i>UAS-dAtad3a</i> <sup>R176W</sup> ;<br><i>PBac{PB}dAtad3a</i> <sup>c05496</sup><br><i>dAtad3a-T2A-Gal4</i> | +                   |
| <i>UAS-dAtad3a</i> <sup>G242V</sup> ;<br><i>PBac{PB}dAtad3a</i> <sup>c05496</sup><br><i>dAtad3a-T2A-Gal4</i> | -                   |
| <i>UAS-dAtad3a</i> <sup>R333P</sup> ;<br><i>PBac{PB}dAtad3a</i> <sup>c05496</sup><br><i>dAtad3a-T2A-Gal4</i> | -                   |

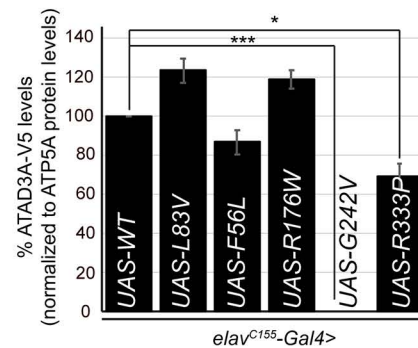

Figure 2

# A Loss of *dAtad3a* causes neurodevelopmental defects

*dAtad3a*<sup>T2A-Gal4/PBac{PB}dAtad3a<sup>c05496</sup></sup>

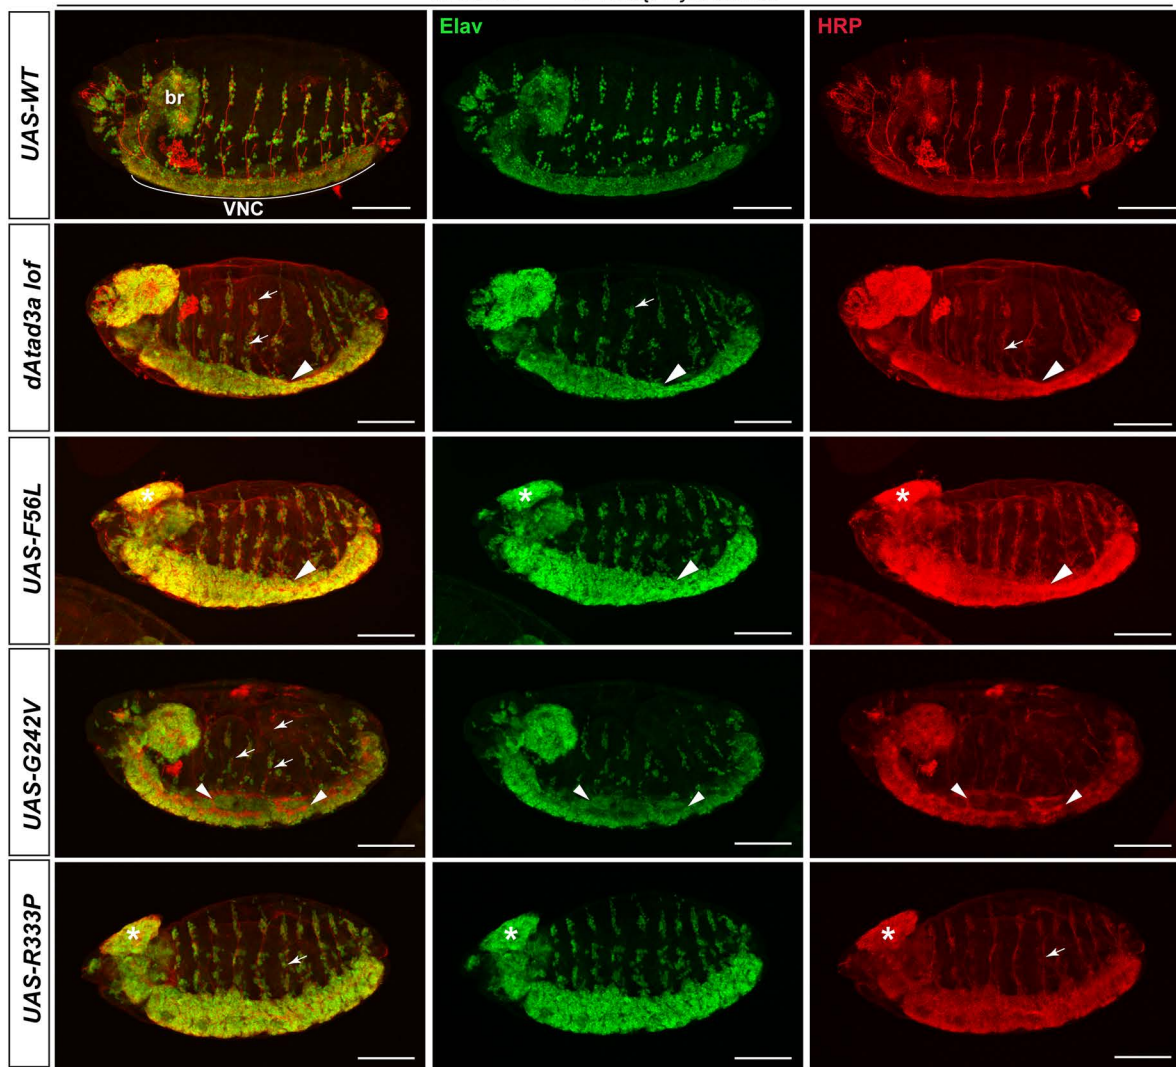

## B

### CNS phenotype

*dAtad3a*<sup>T2A-Gal4/PBac{PB}dAtad3a<sup>c05496</sup></sup>

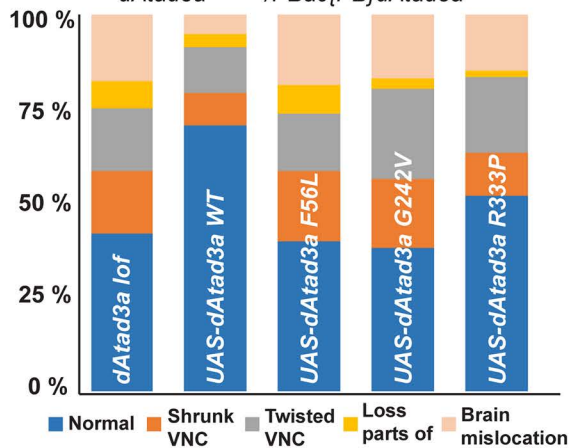

### PNS phenotype

*dAtad3a*<sup>T2A-Gal4/PBac{PB}dAtad3a<sup>c05496</sup></sup>

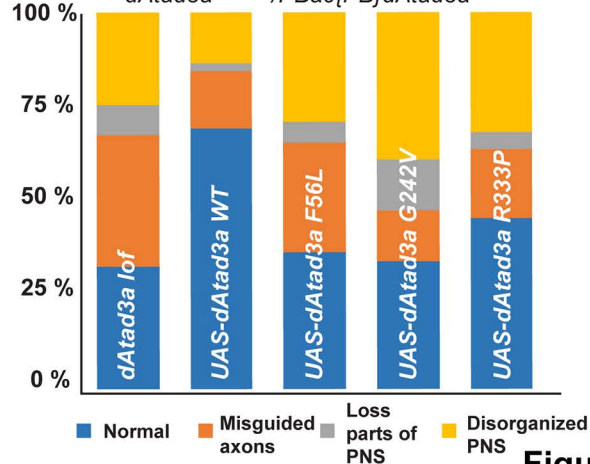

Figure 3

**A****Life Span**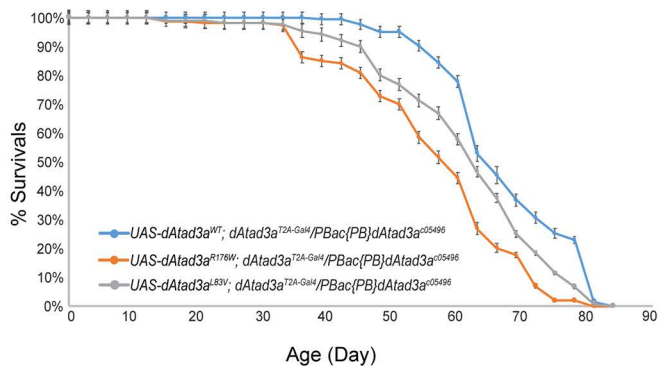**B****Locomotion**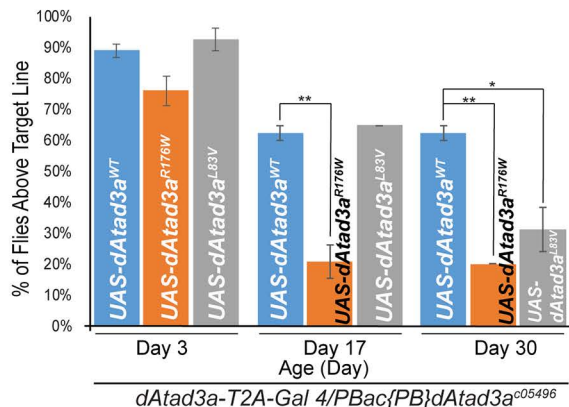**C Flight Assay**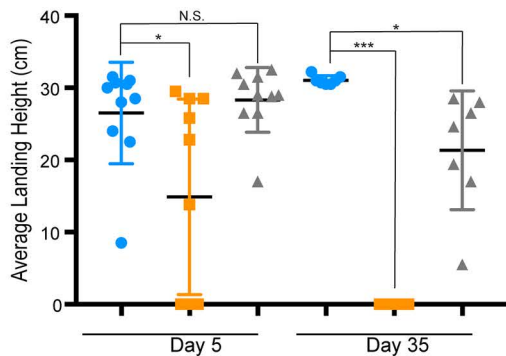

●

 $UAS-dAtad3a^{WT}; dAtad3a^{T2A-Gal4}/PBac\{PB\}dAtad3a^{c05496}$ 

■

 $UAS-dAtad3a^{R176W}; dAtad3a^{T2A-Gal4}/PBac\{PB\}dAtad3a^{c05496}$ 

▲

 $UAS-dAtad3a^{L83V}; dAtad3a^{T2A-Gal4}/PBac\{PB\}dAtad3a^{c05496}$ 
**Figure 4**



**A** R176W and L83V variants cause increased Ref(2)p levels in aged flies

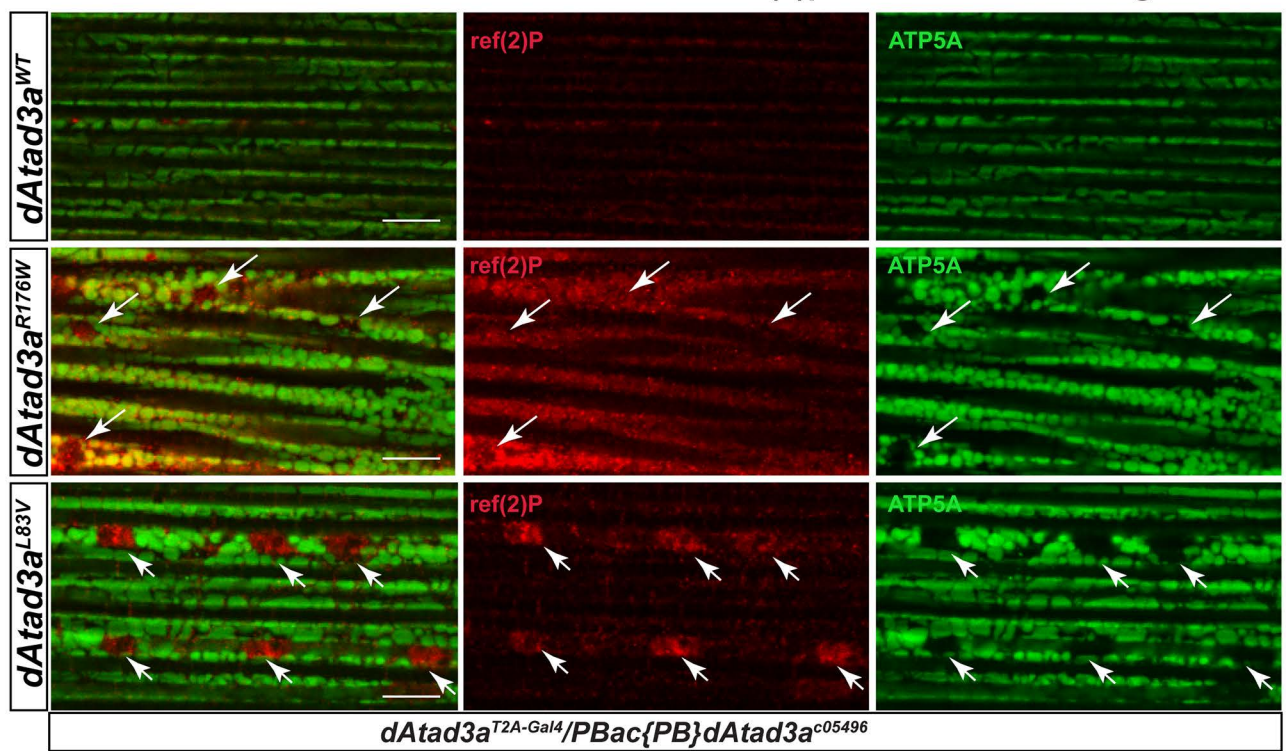

**B**

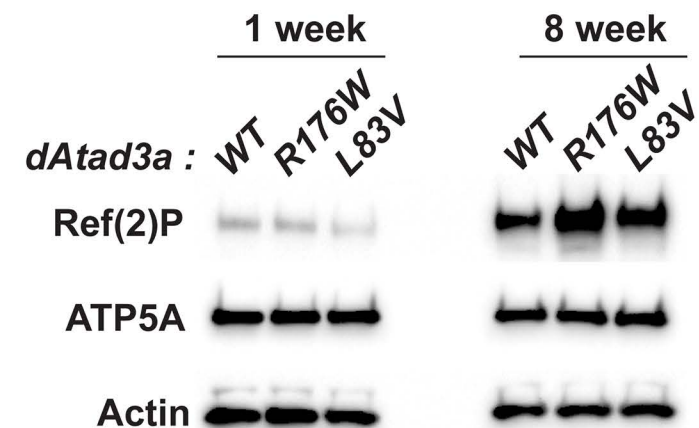

**C**

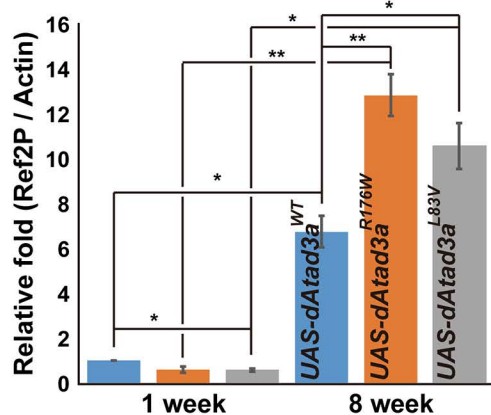

**D**

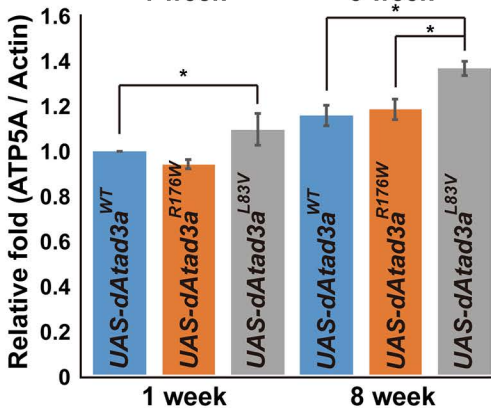

**Figure 5**

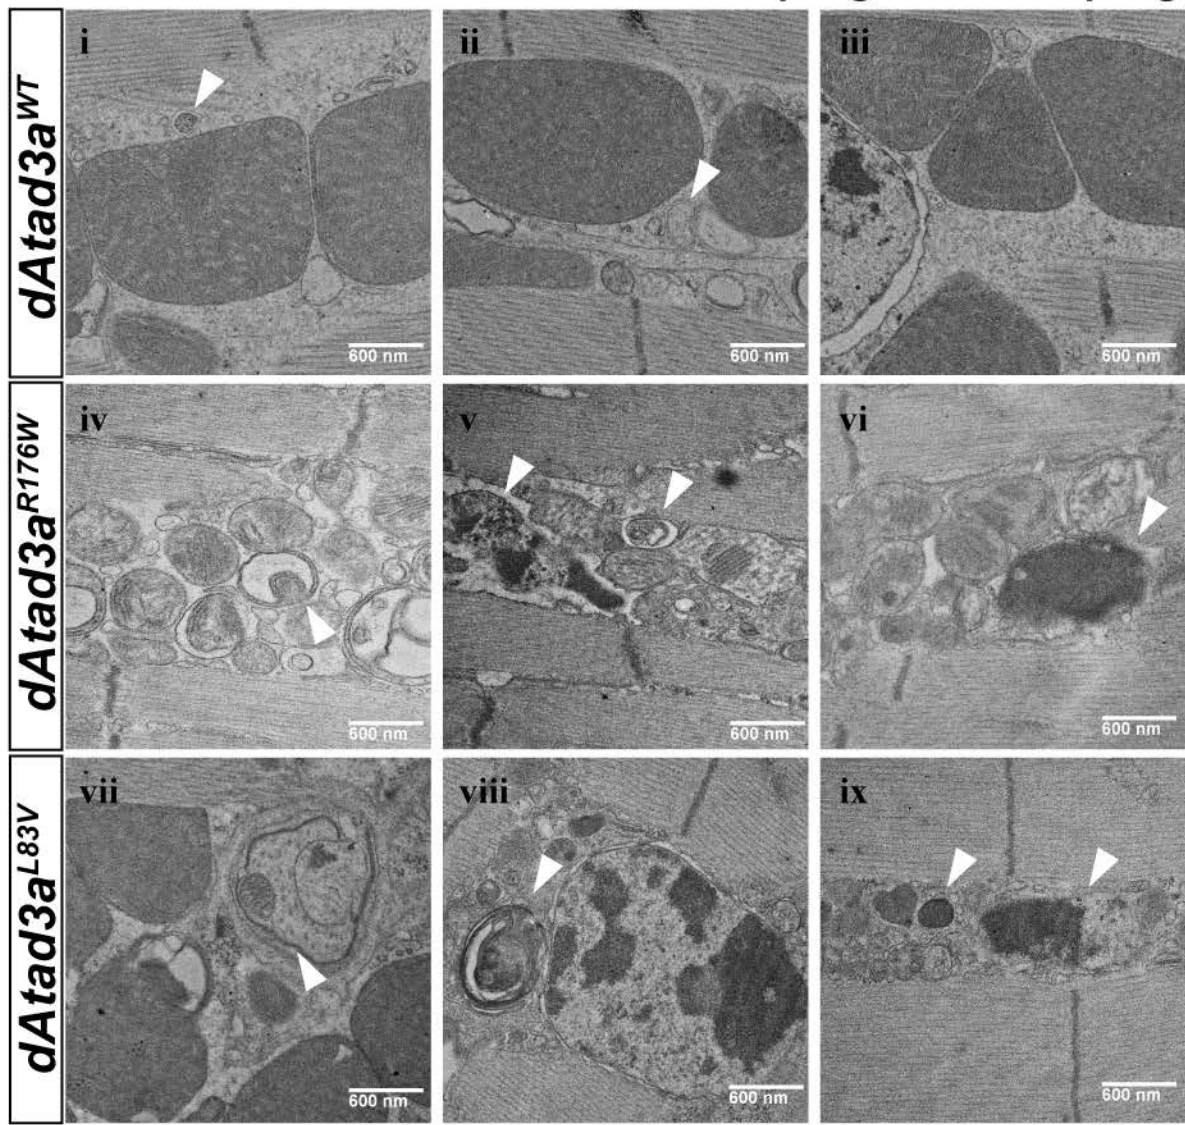

B

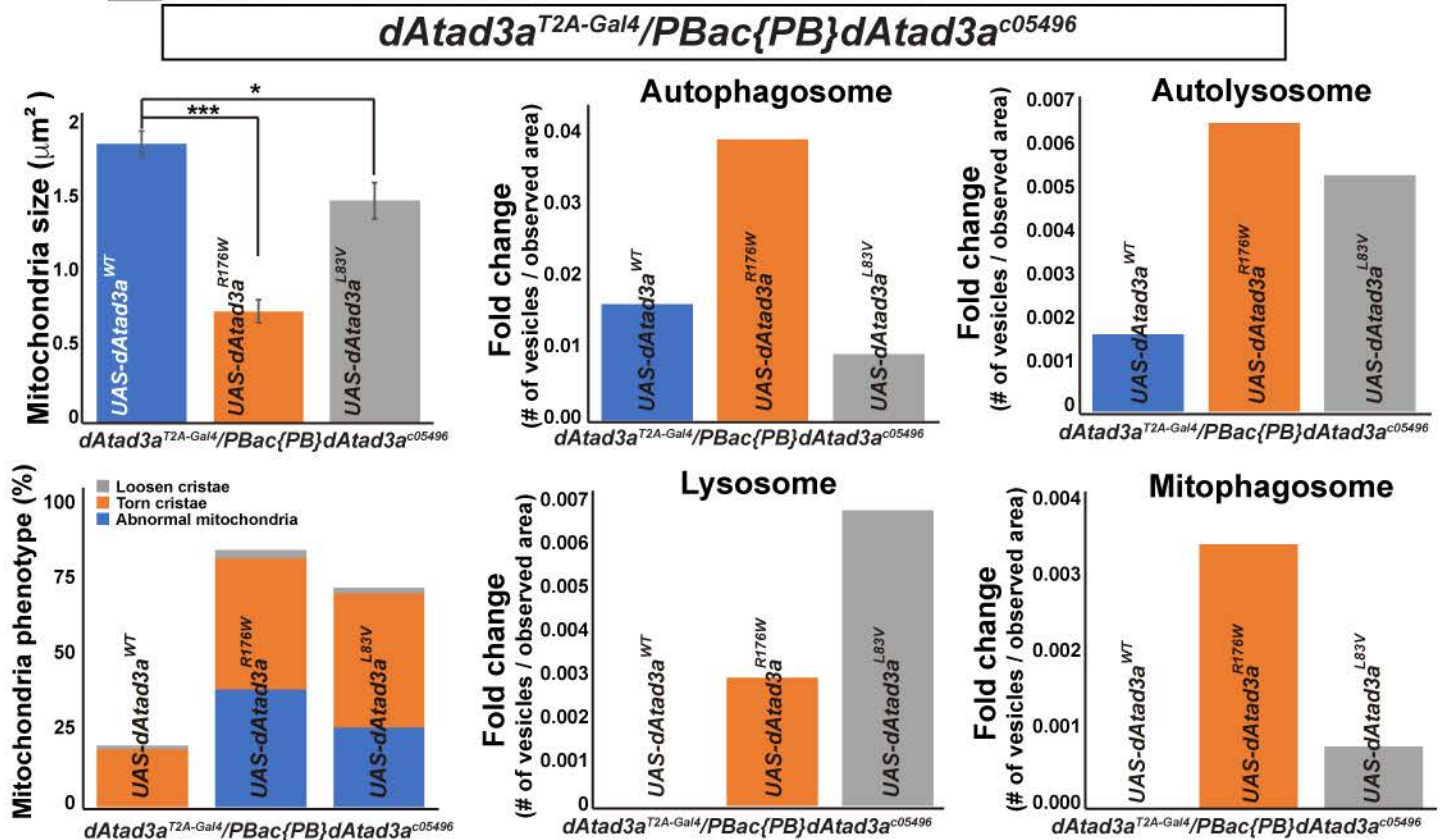

Figure 6
